# Supplementary material for: Synthesis of allenamides by Pd-catalyzed coupling of 3-alkoxycarbonyloxy ynamides or 1-alkoxycarbonyloxy allenamides with arylboronic acids
Source: Royal Society of Chemistry journal article supplement (doi:10.1039/c2ob26727f), 2012-01-01

**Synthesis of allenamides by Pd-catalyzed coupling of  
3-alkoxycarbonyloxy ynamides or 1-alkoxycarbonyloxy allenamides  
with arylboronic acids**

*Jian Cao, \* Yulong Kong, Yuan Deng, Guoqiao Lai, \* Yuning Cui, Ziqiang Hu and*

*Guanhai Wang*

*Key Laboratory of Organosilicon Chemistry and Material Technology of Ministry of*

*Education, Hangzhou Normal University, Wenyi Road 222, Hangzhou 310012,*

*People's Republic of China*

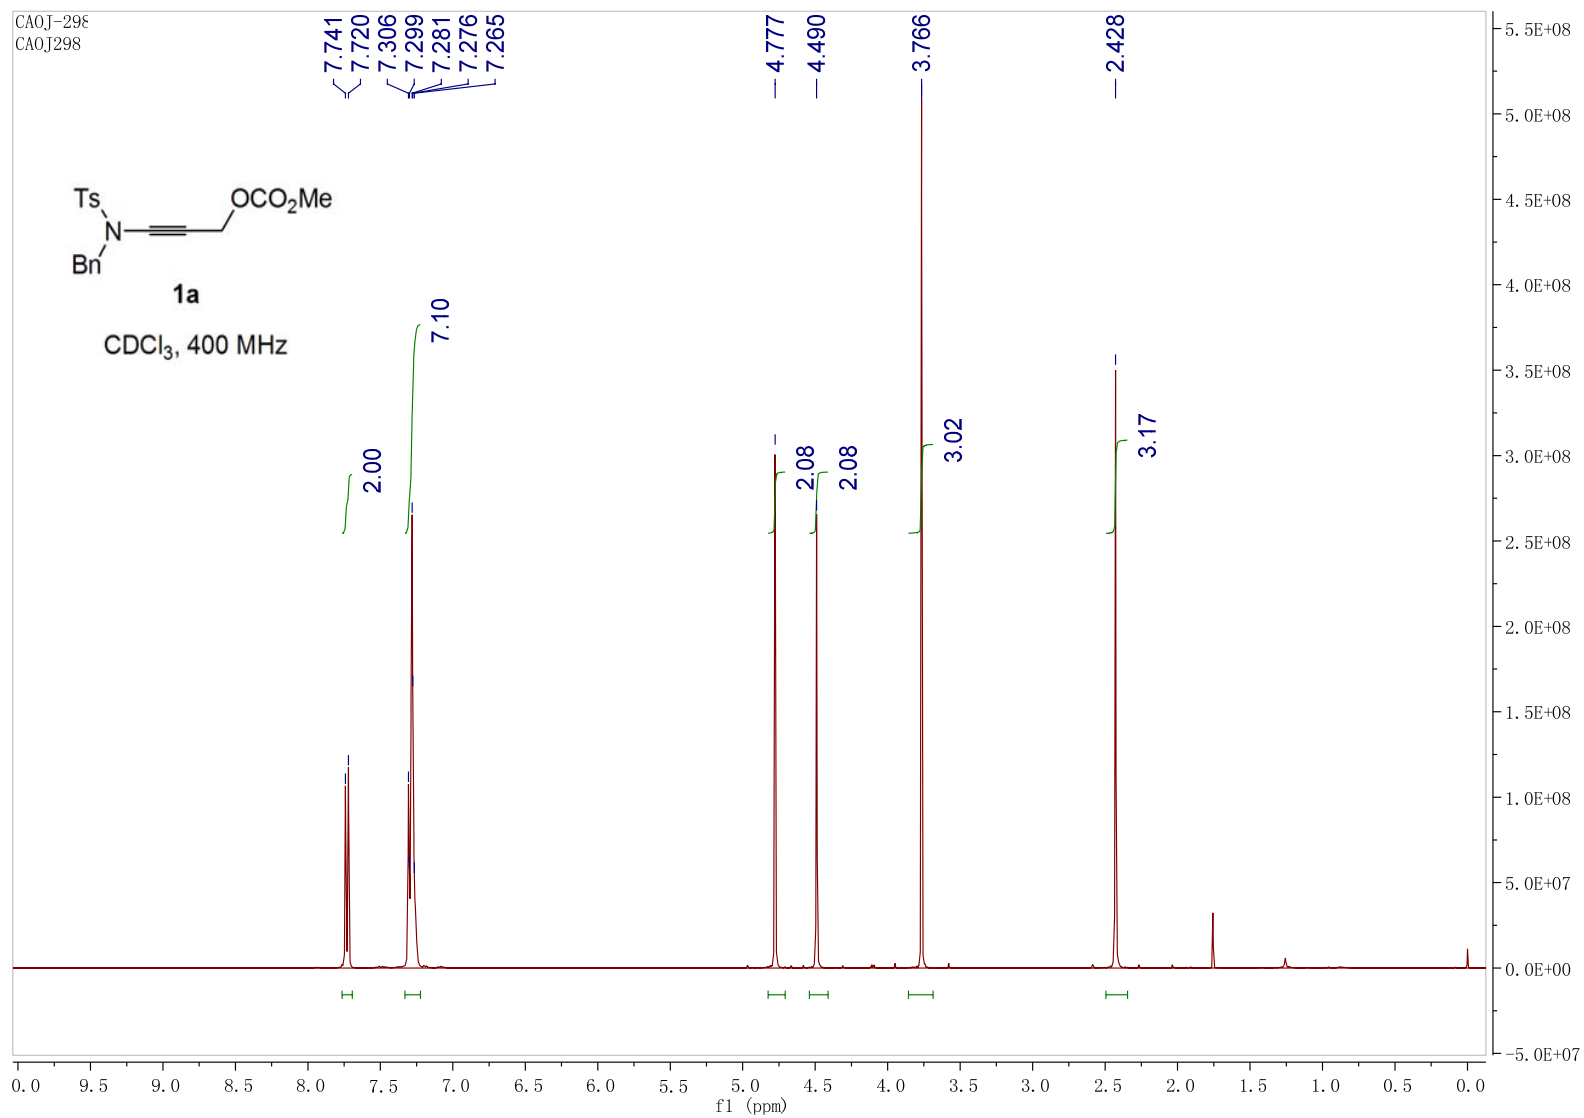

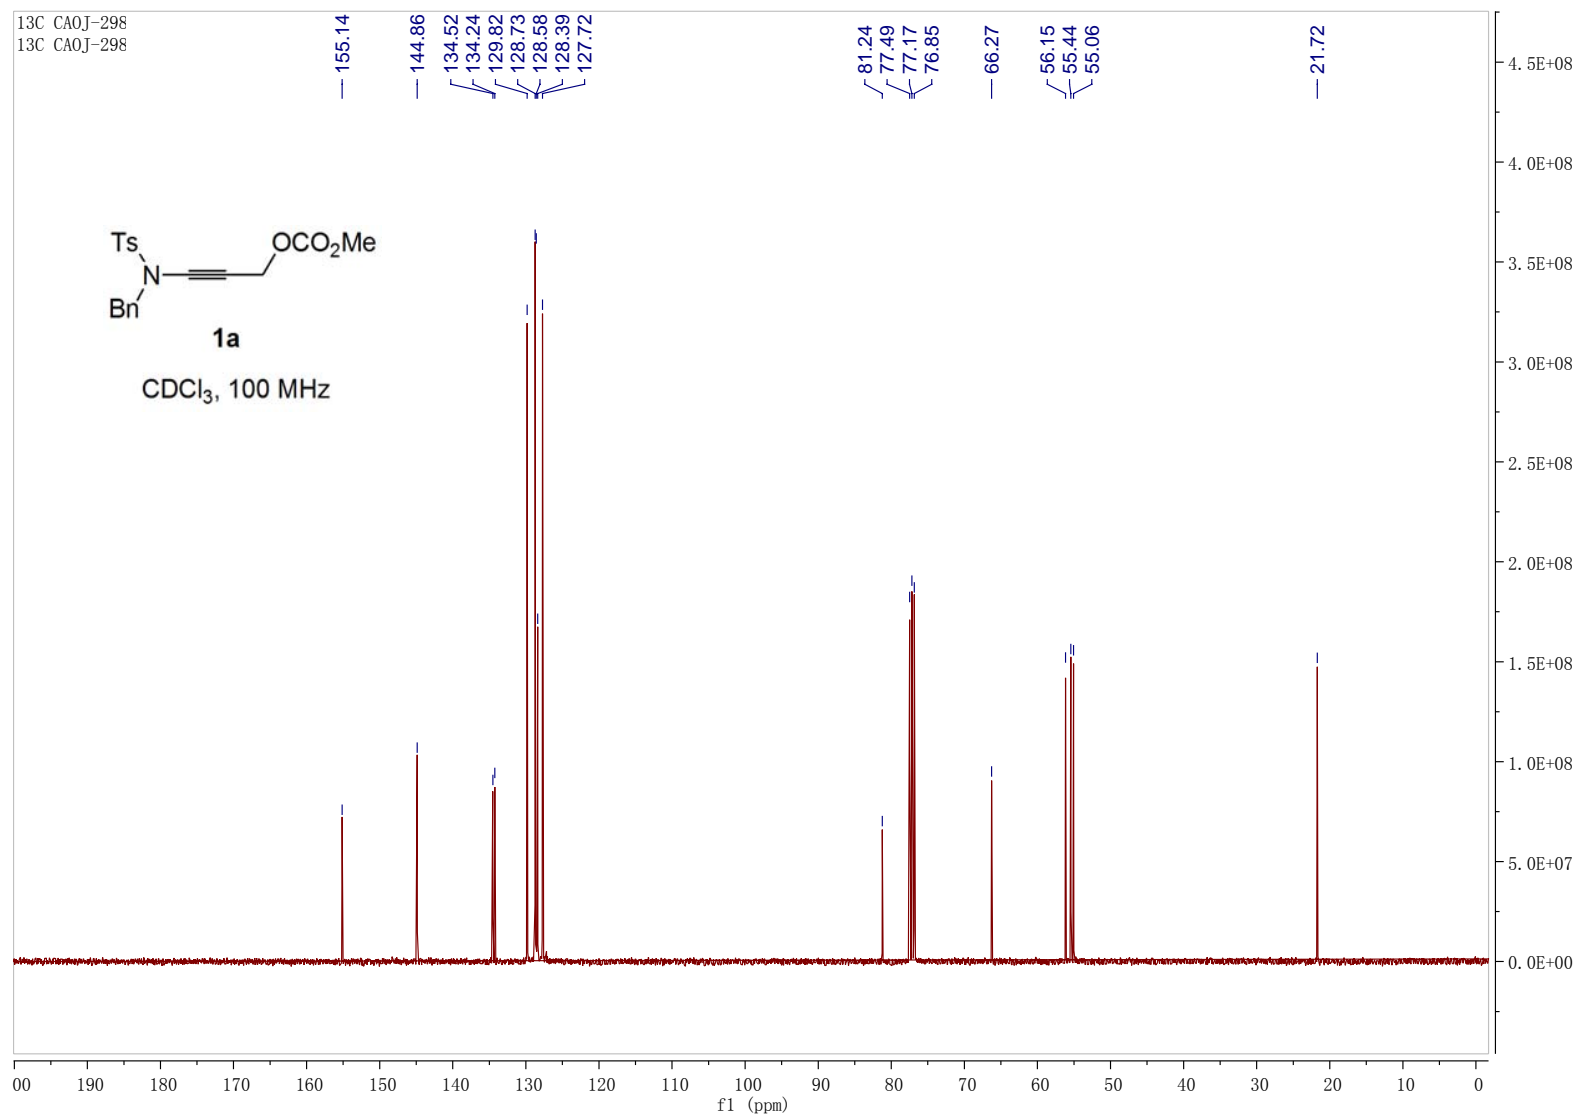

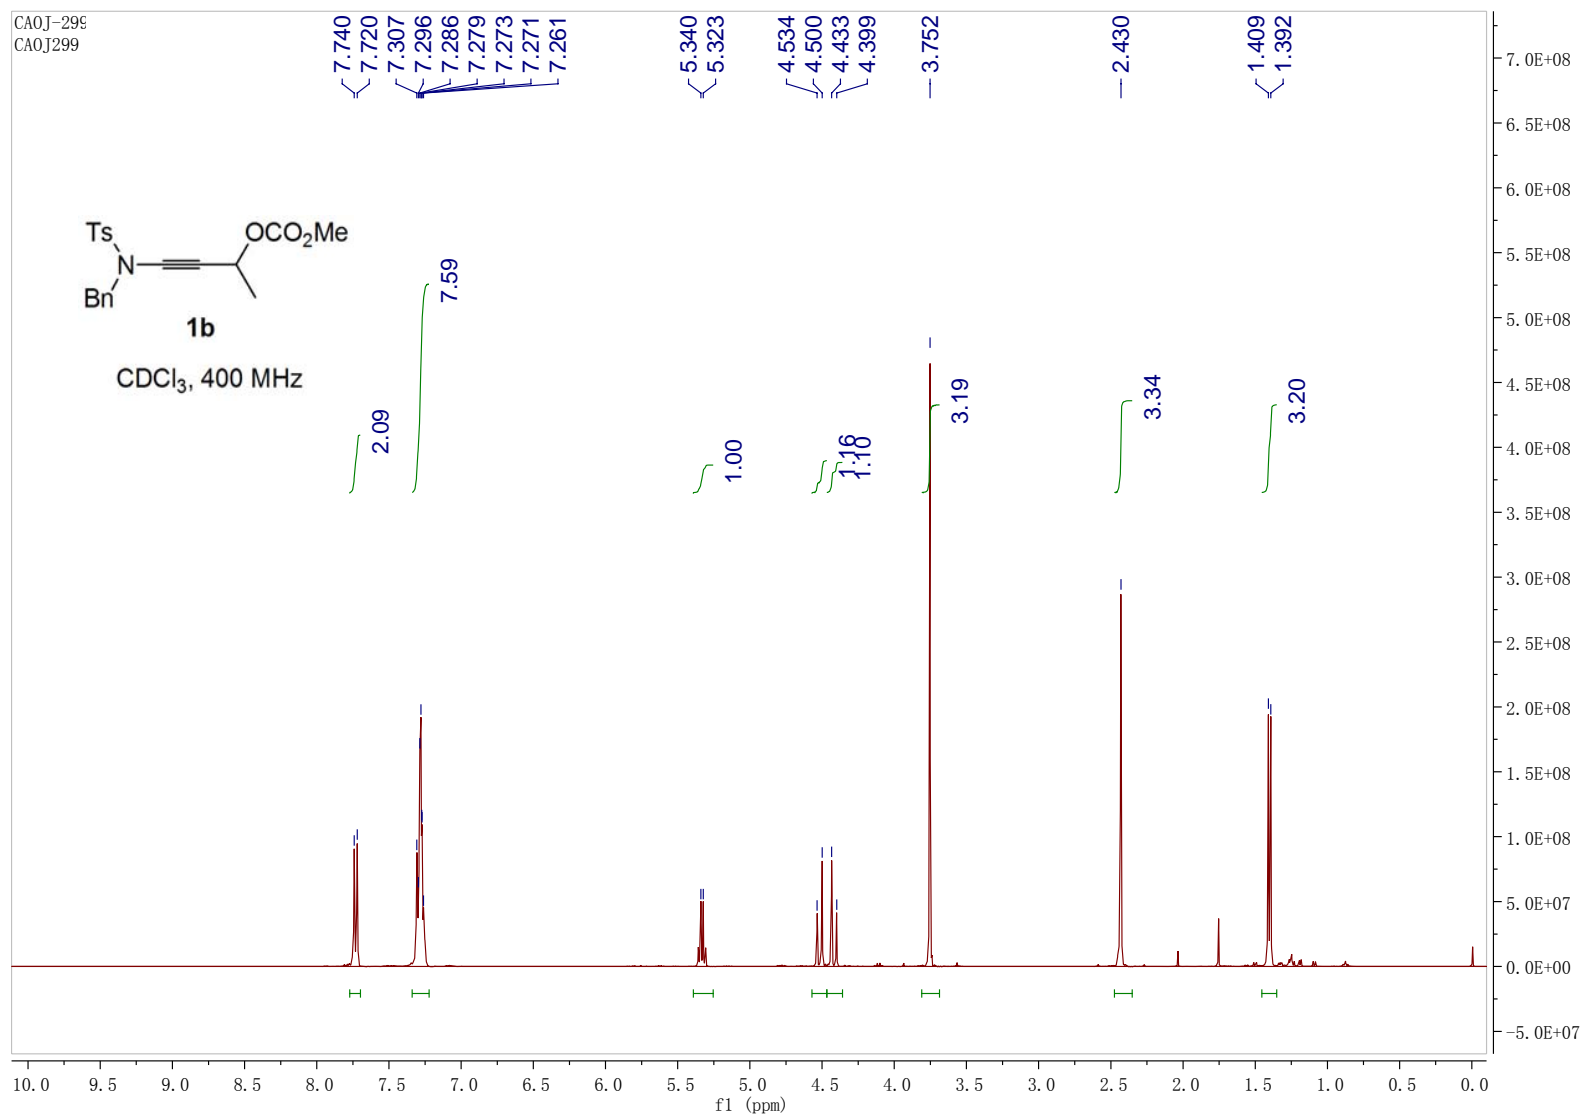

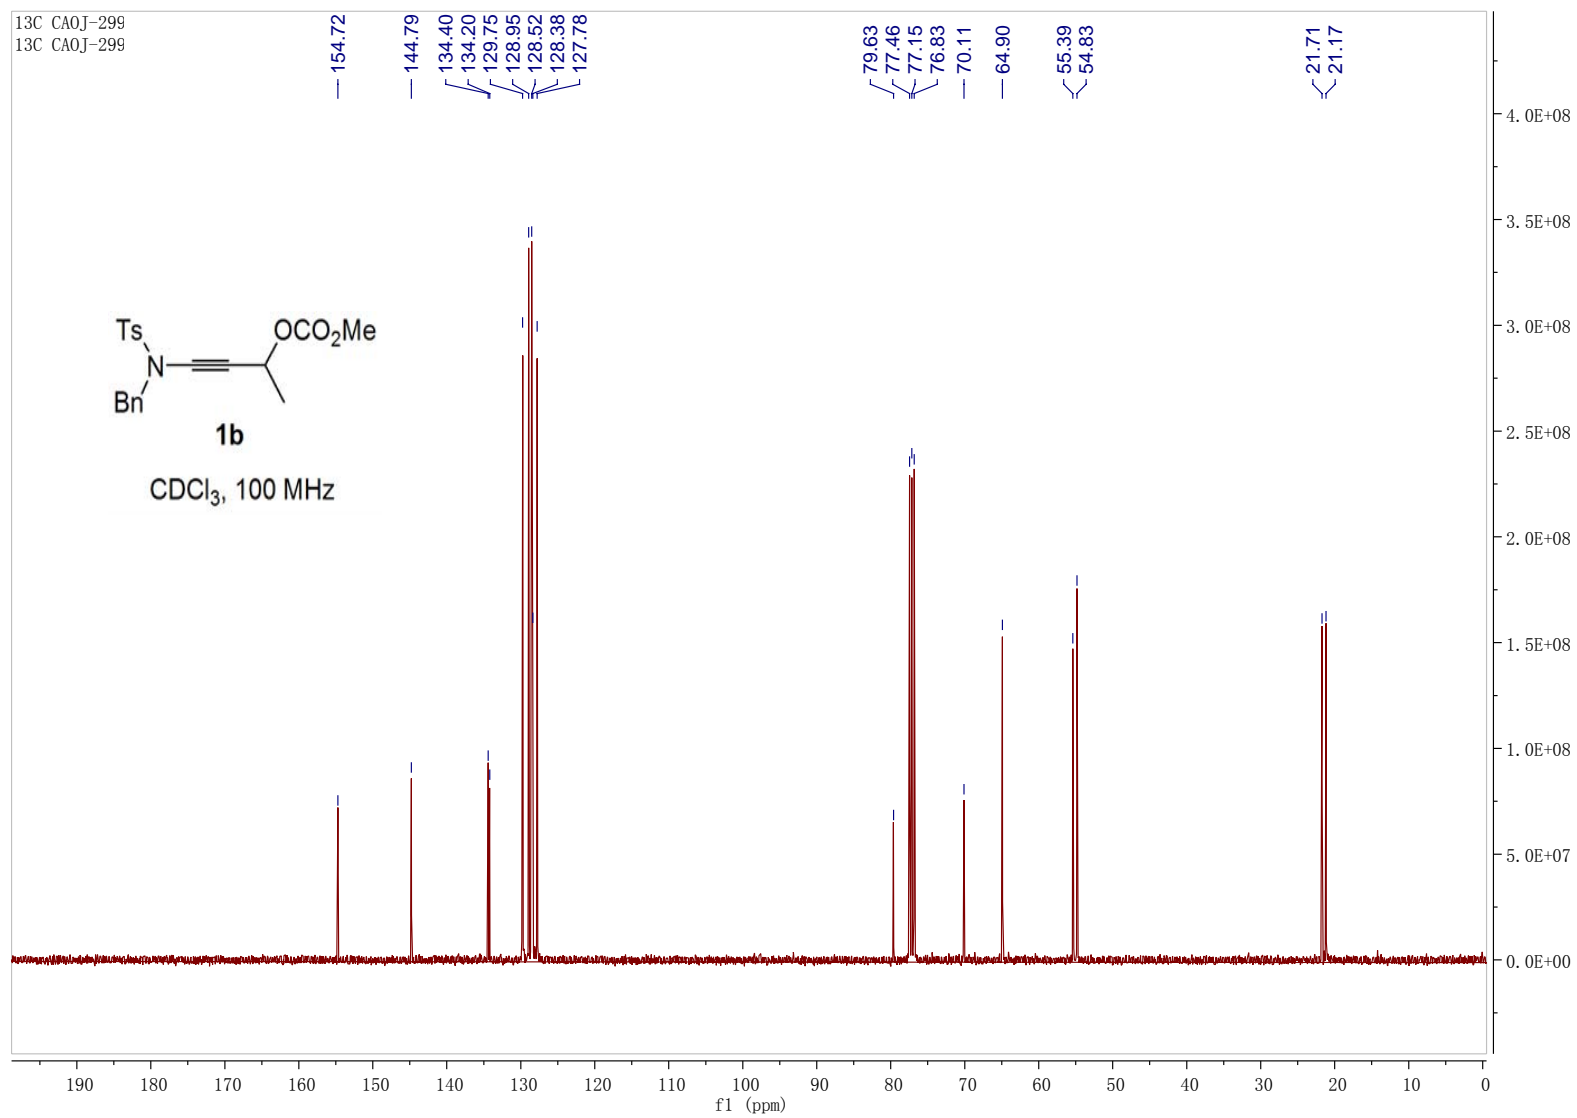

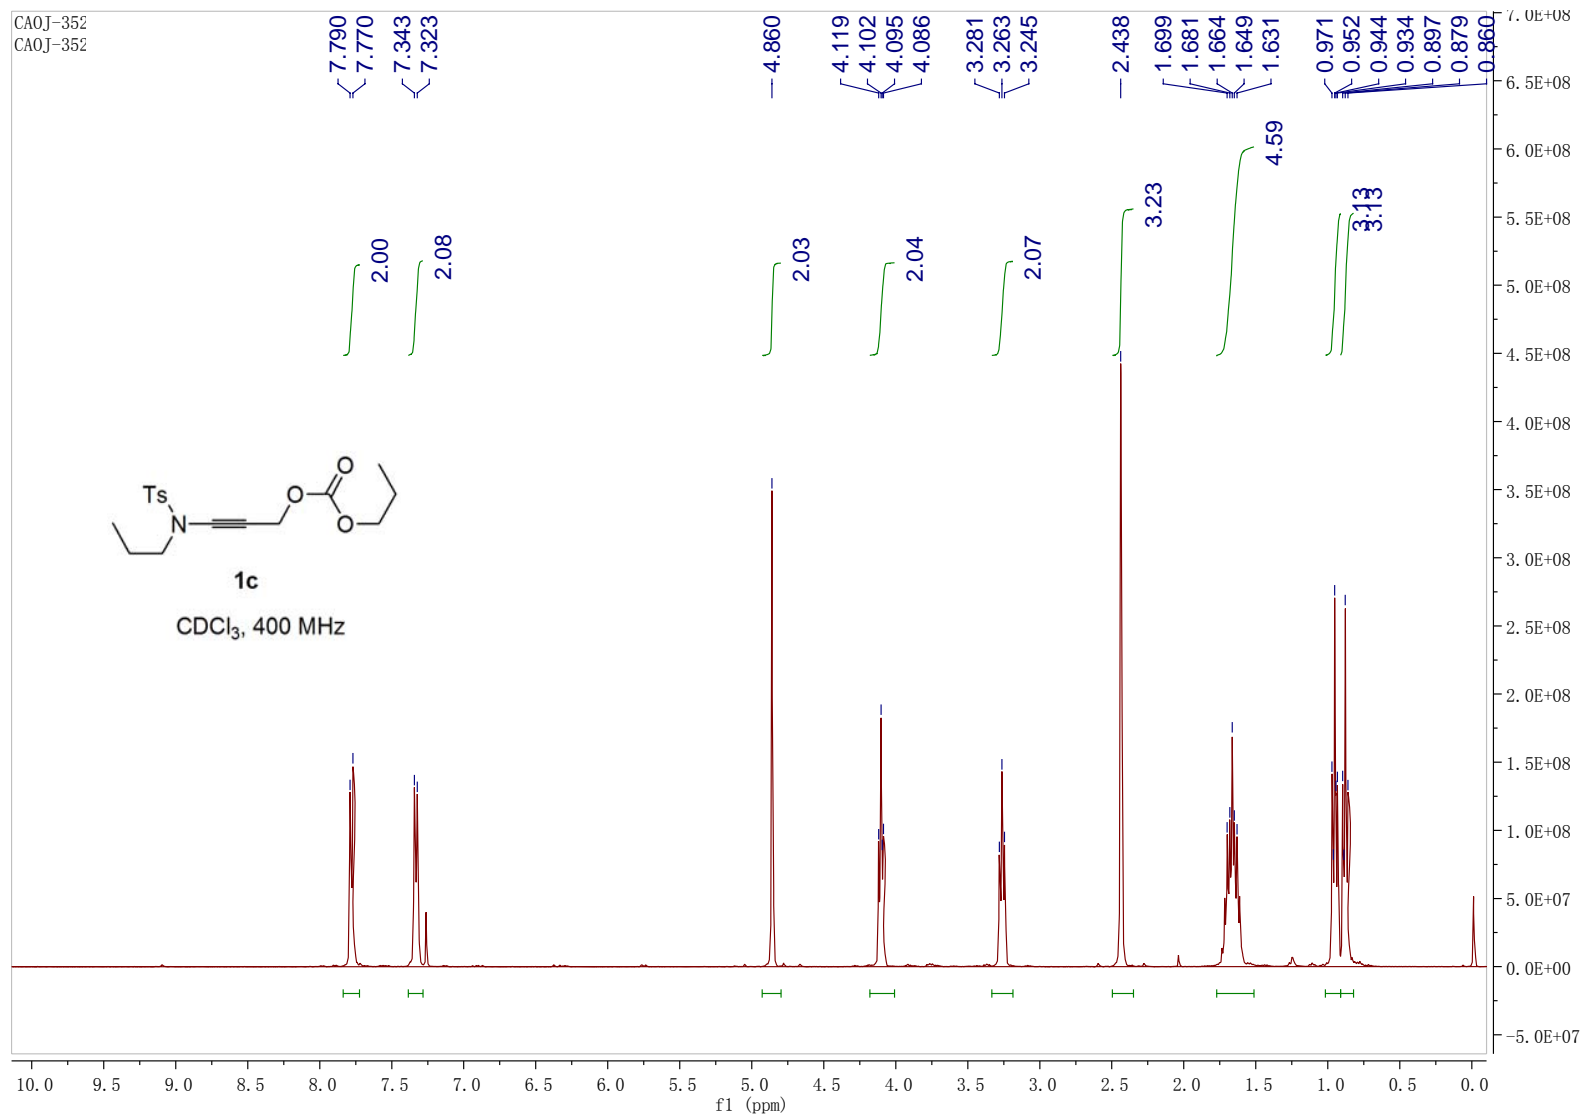

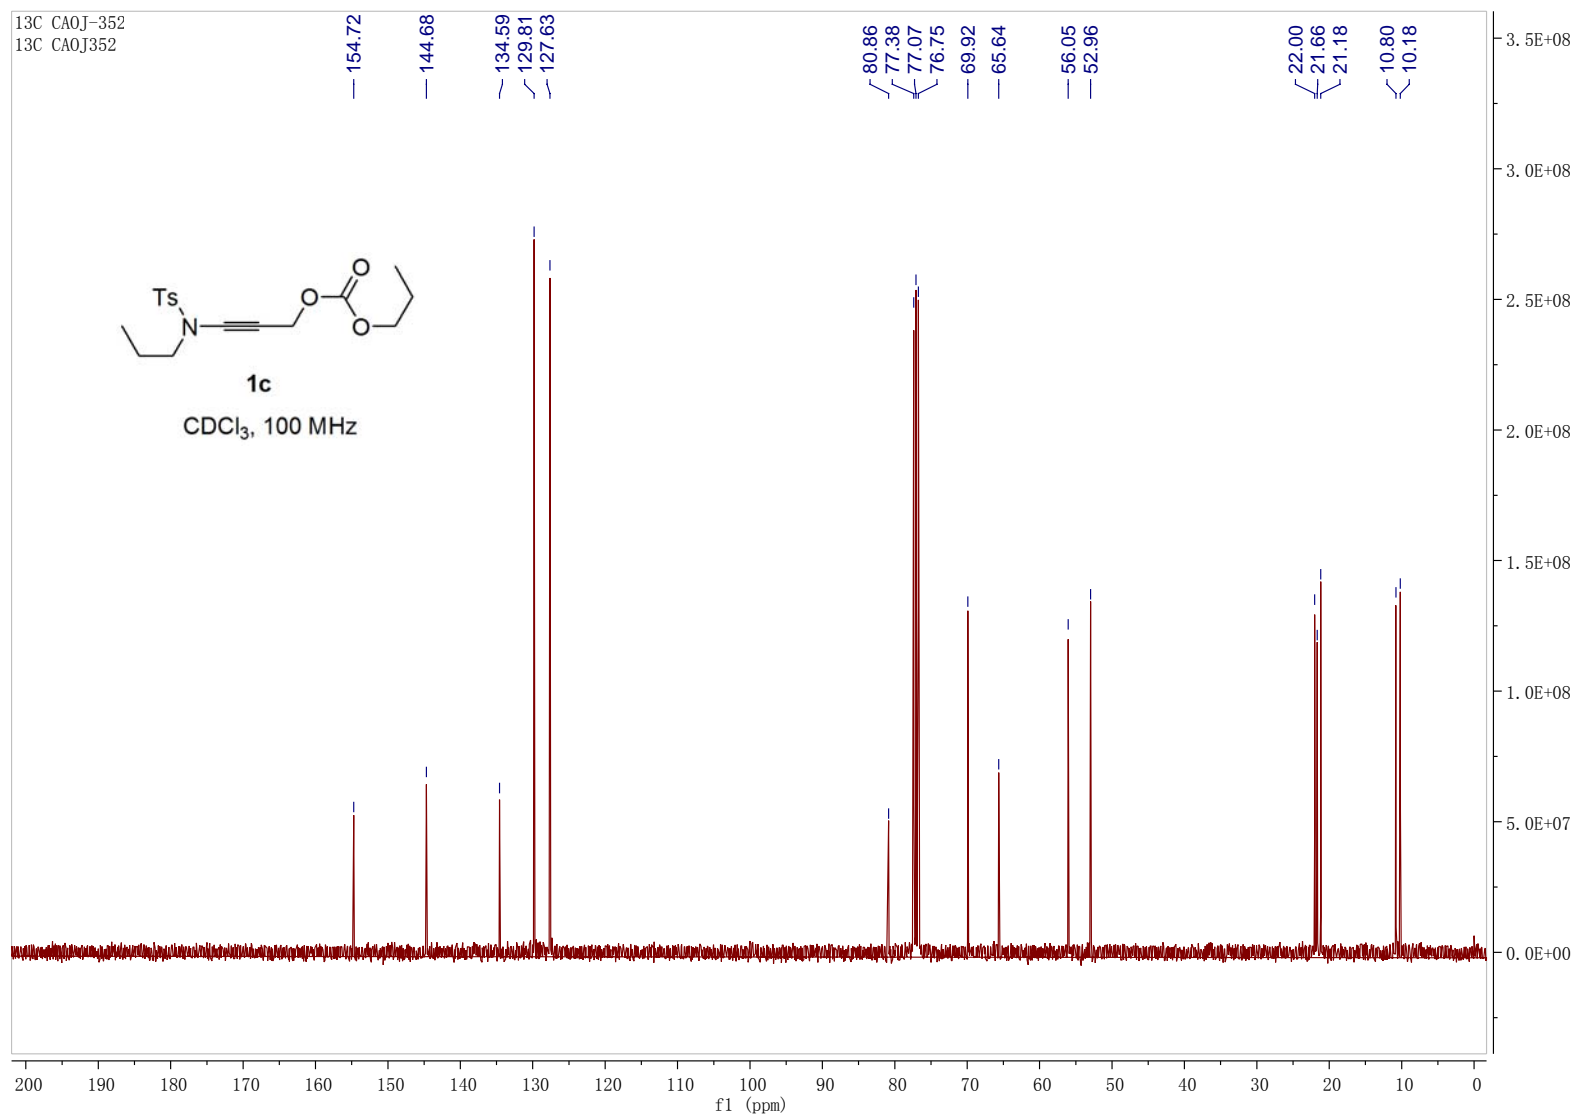

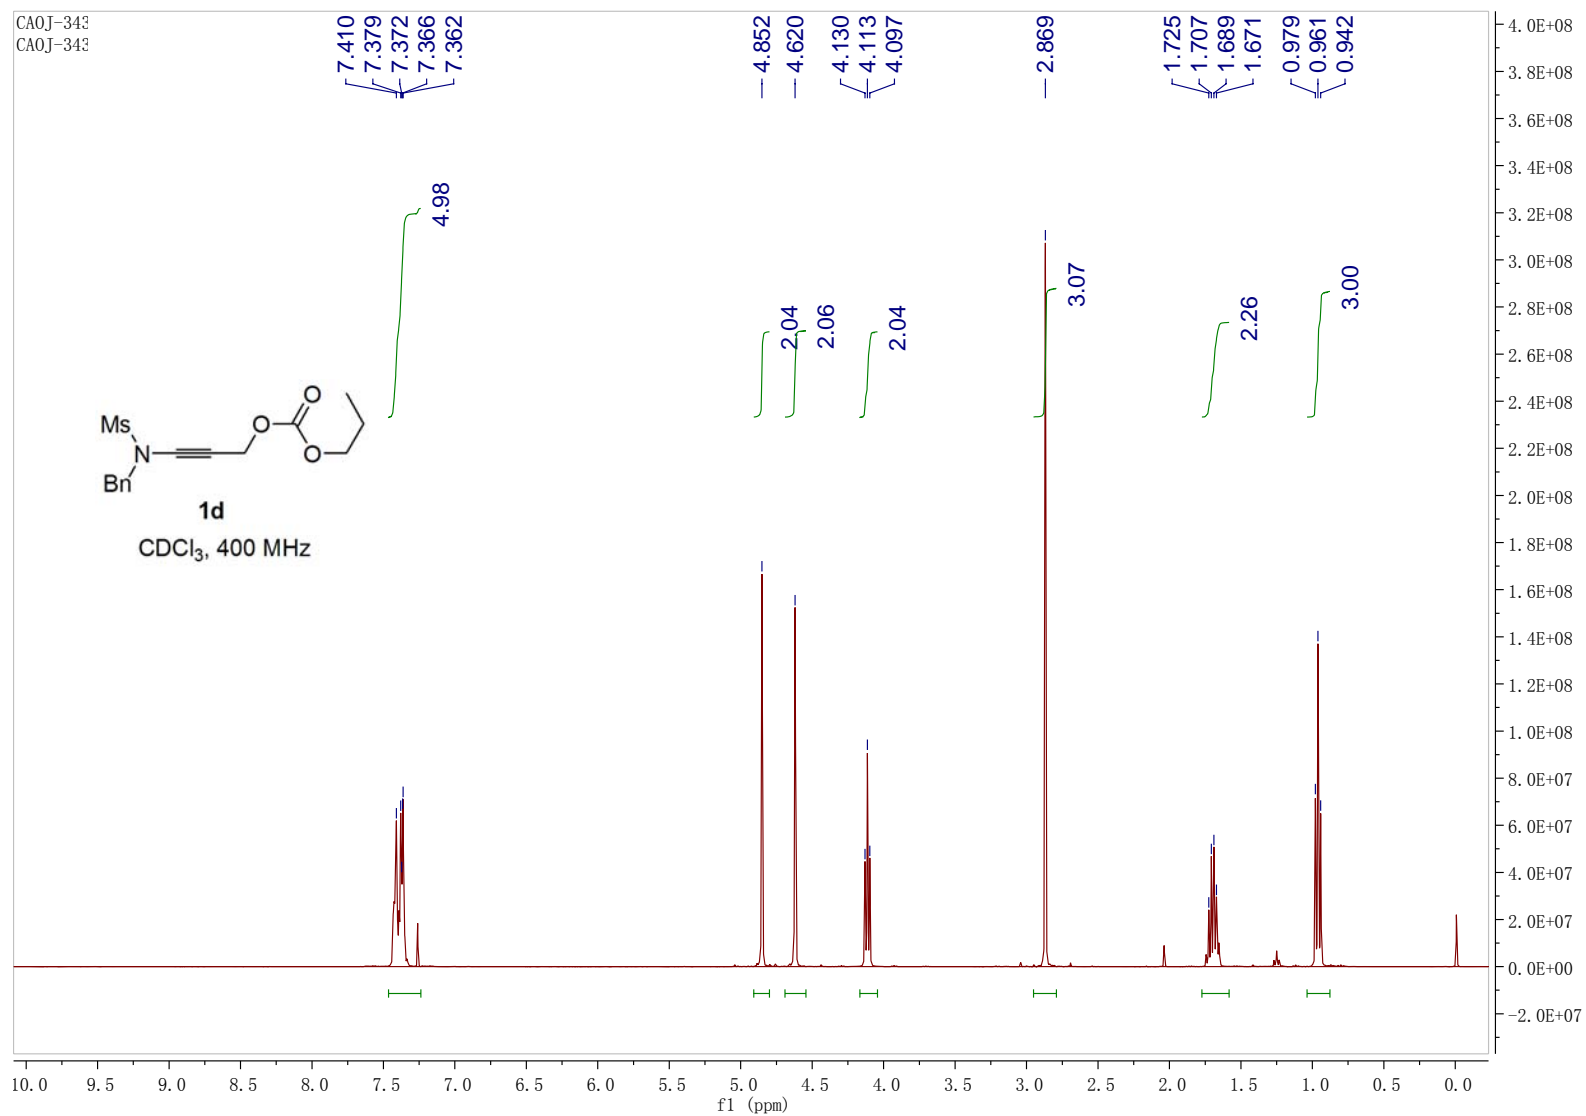



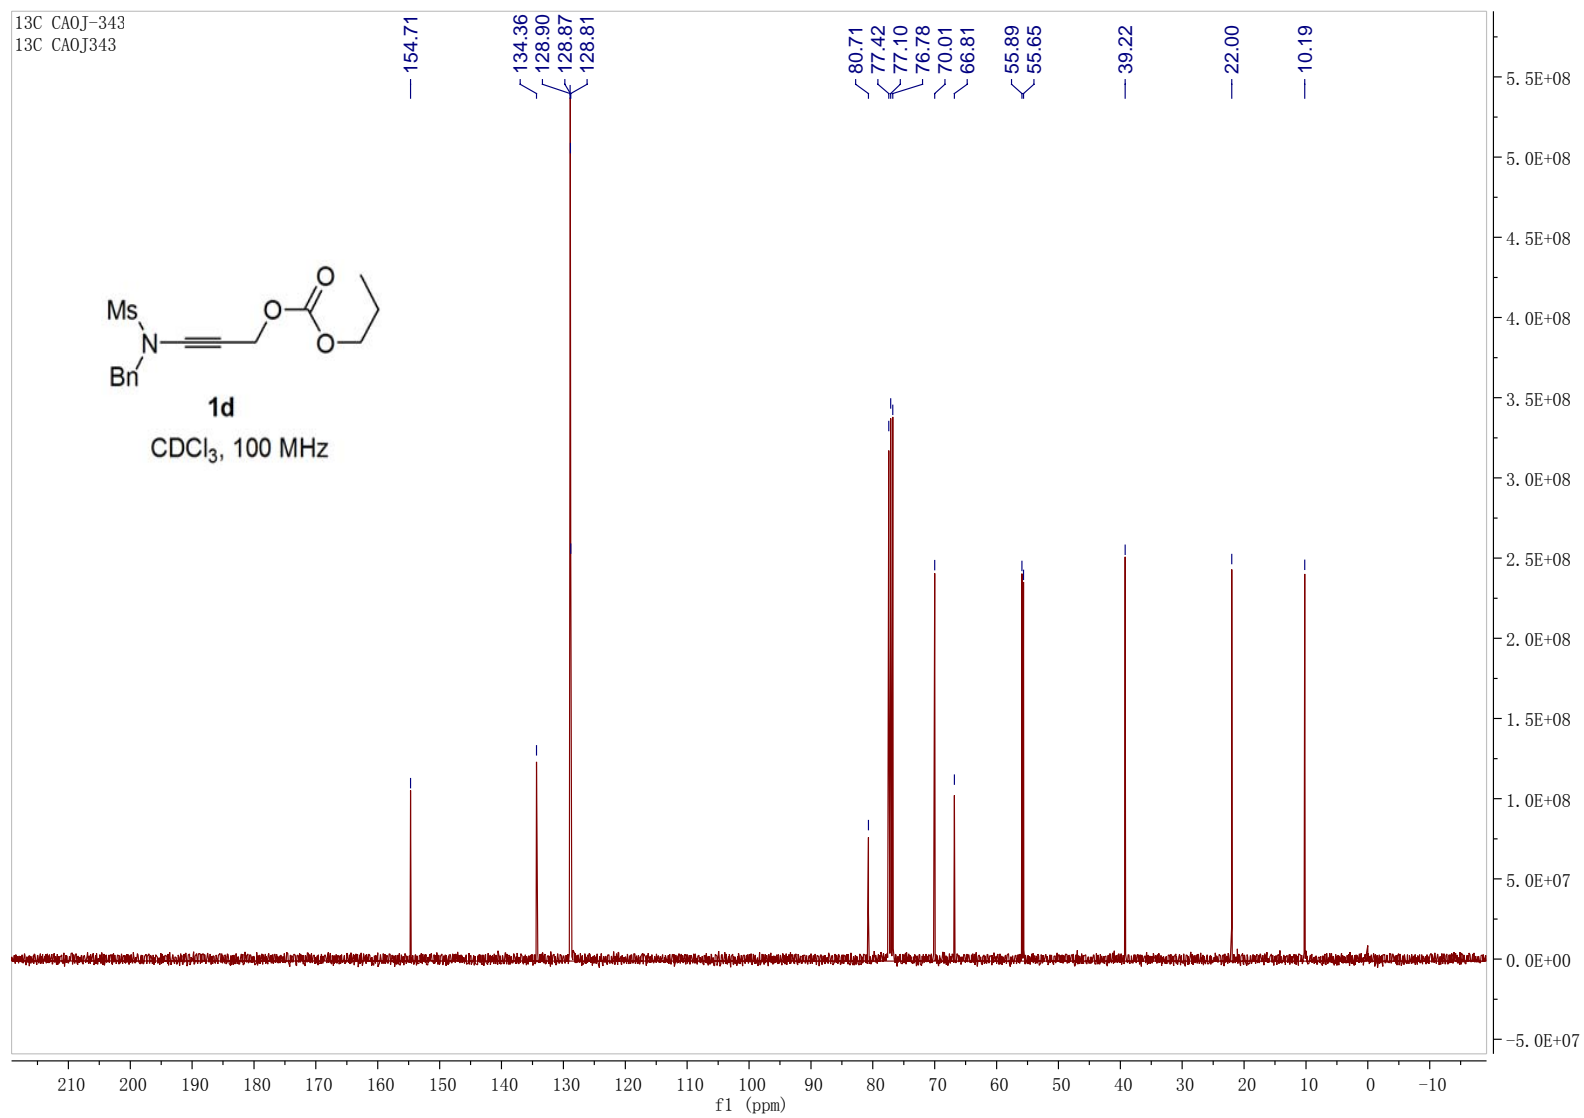

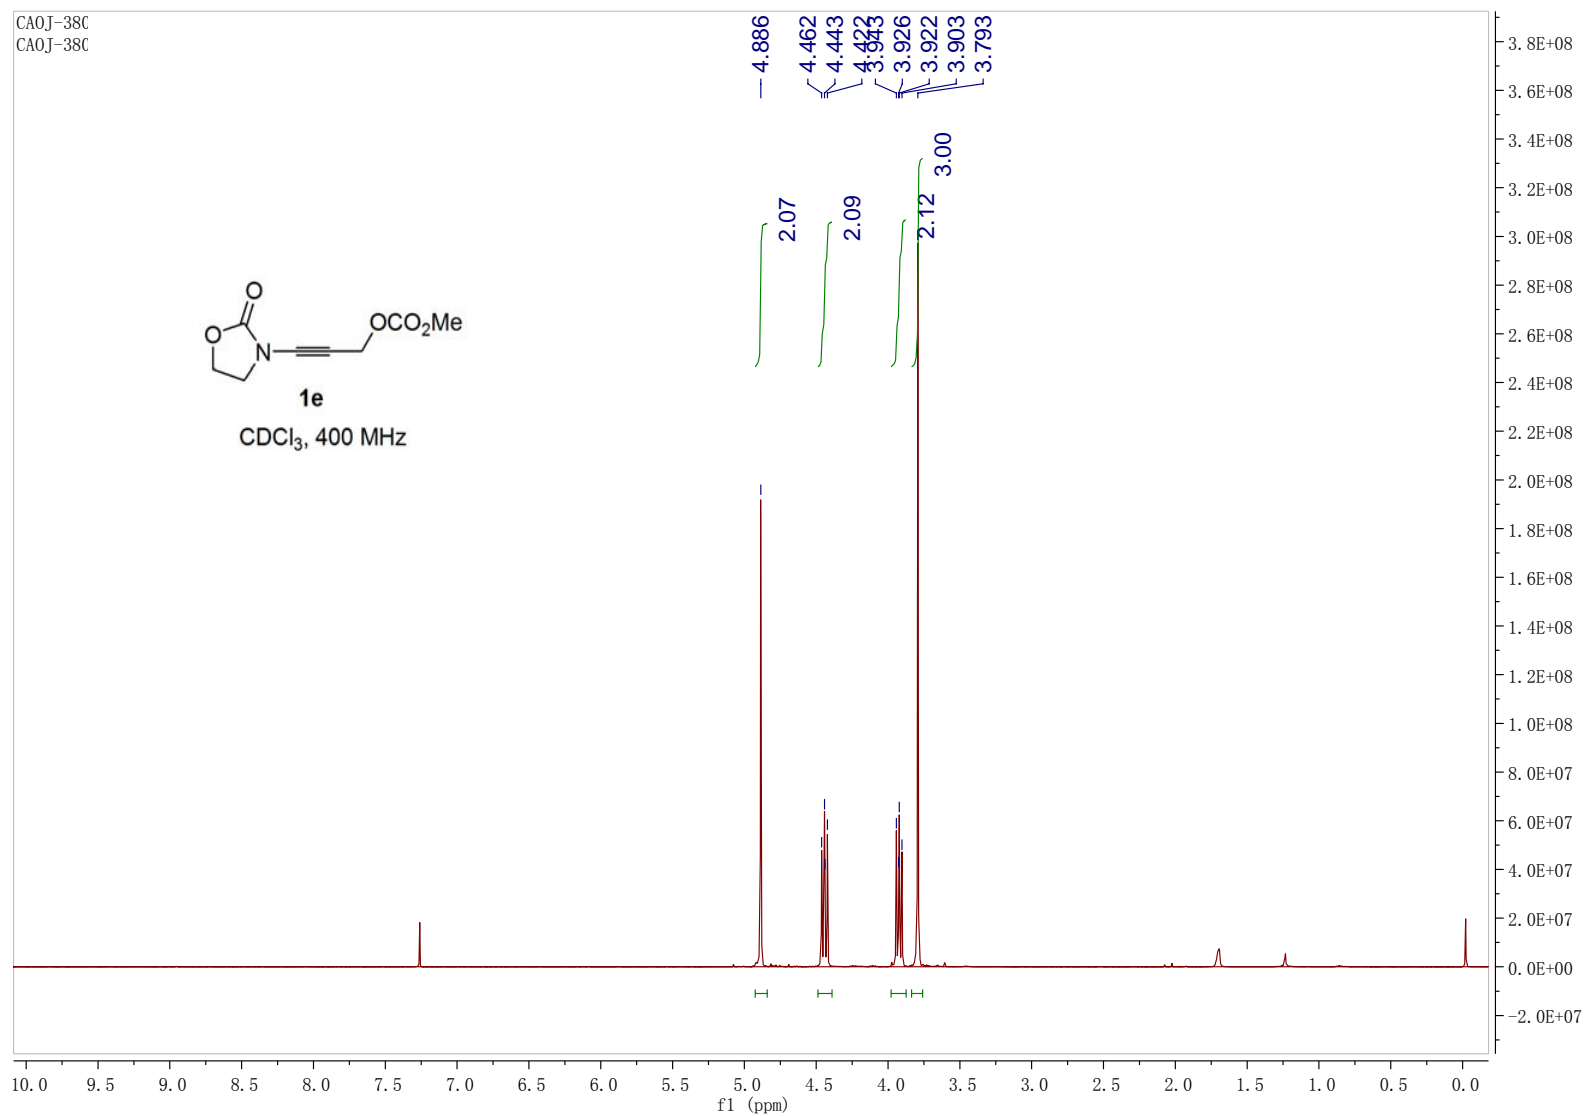

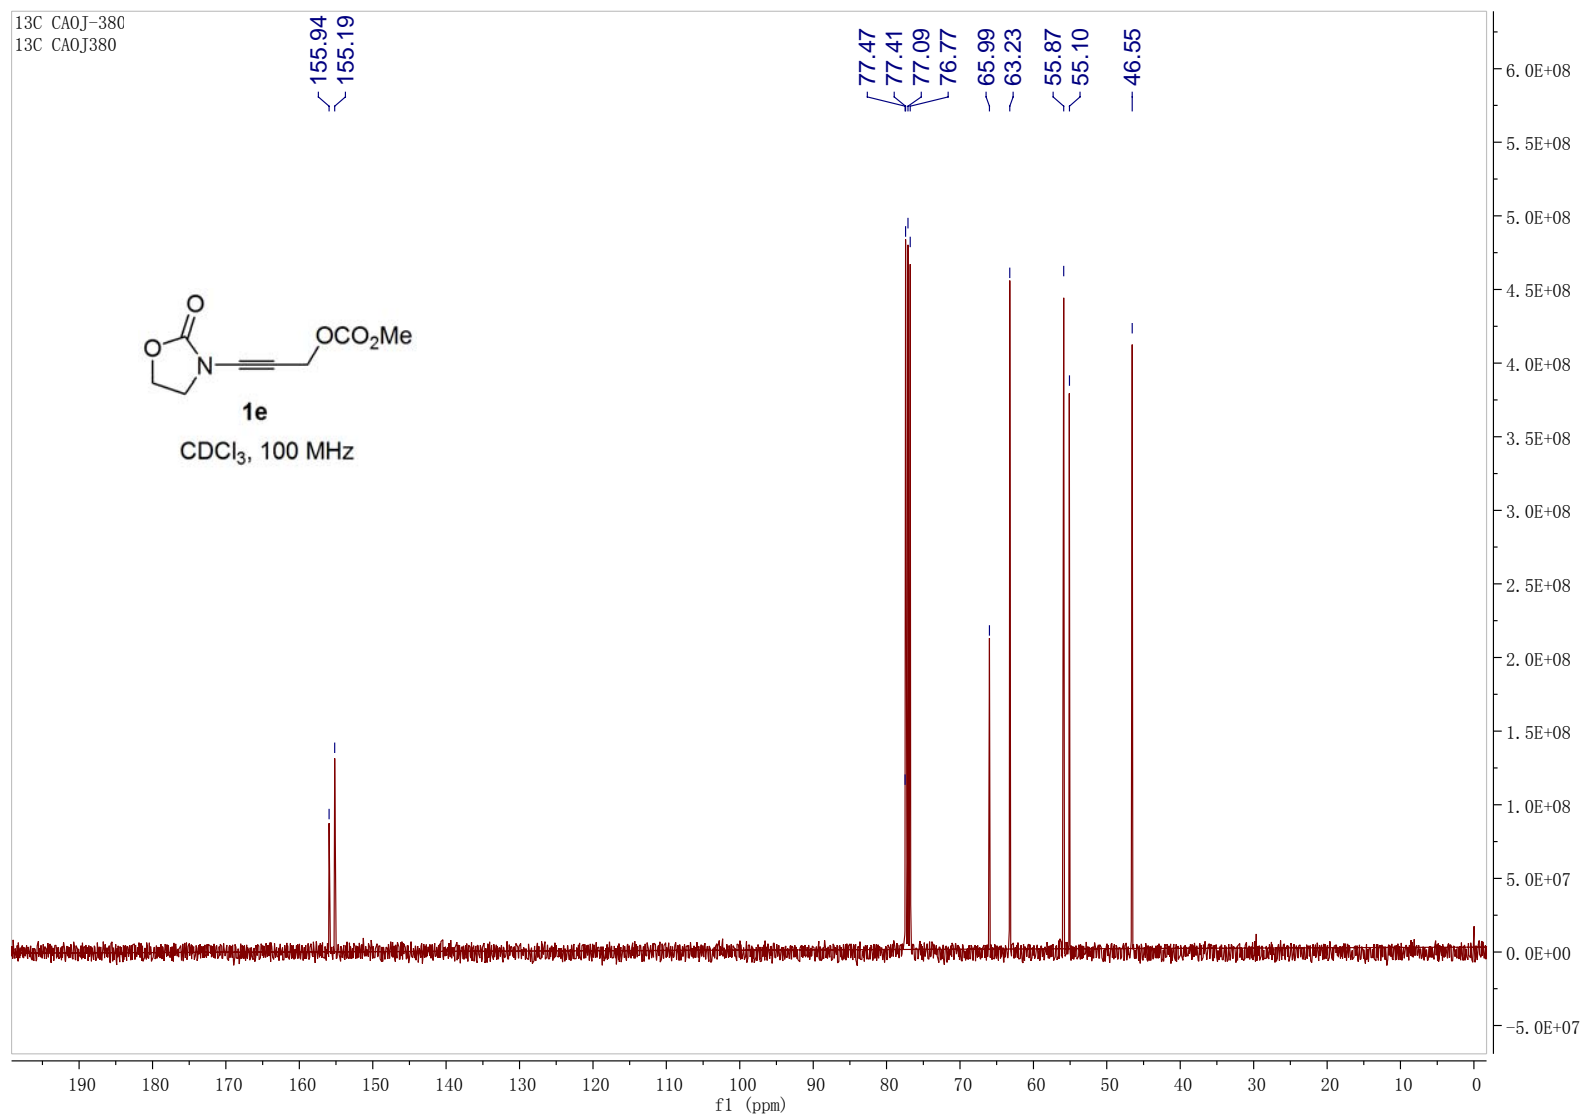

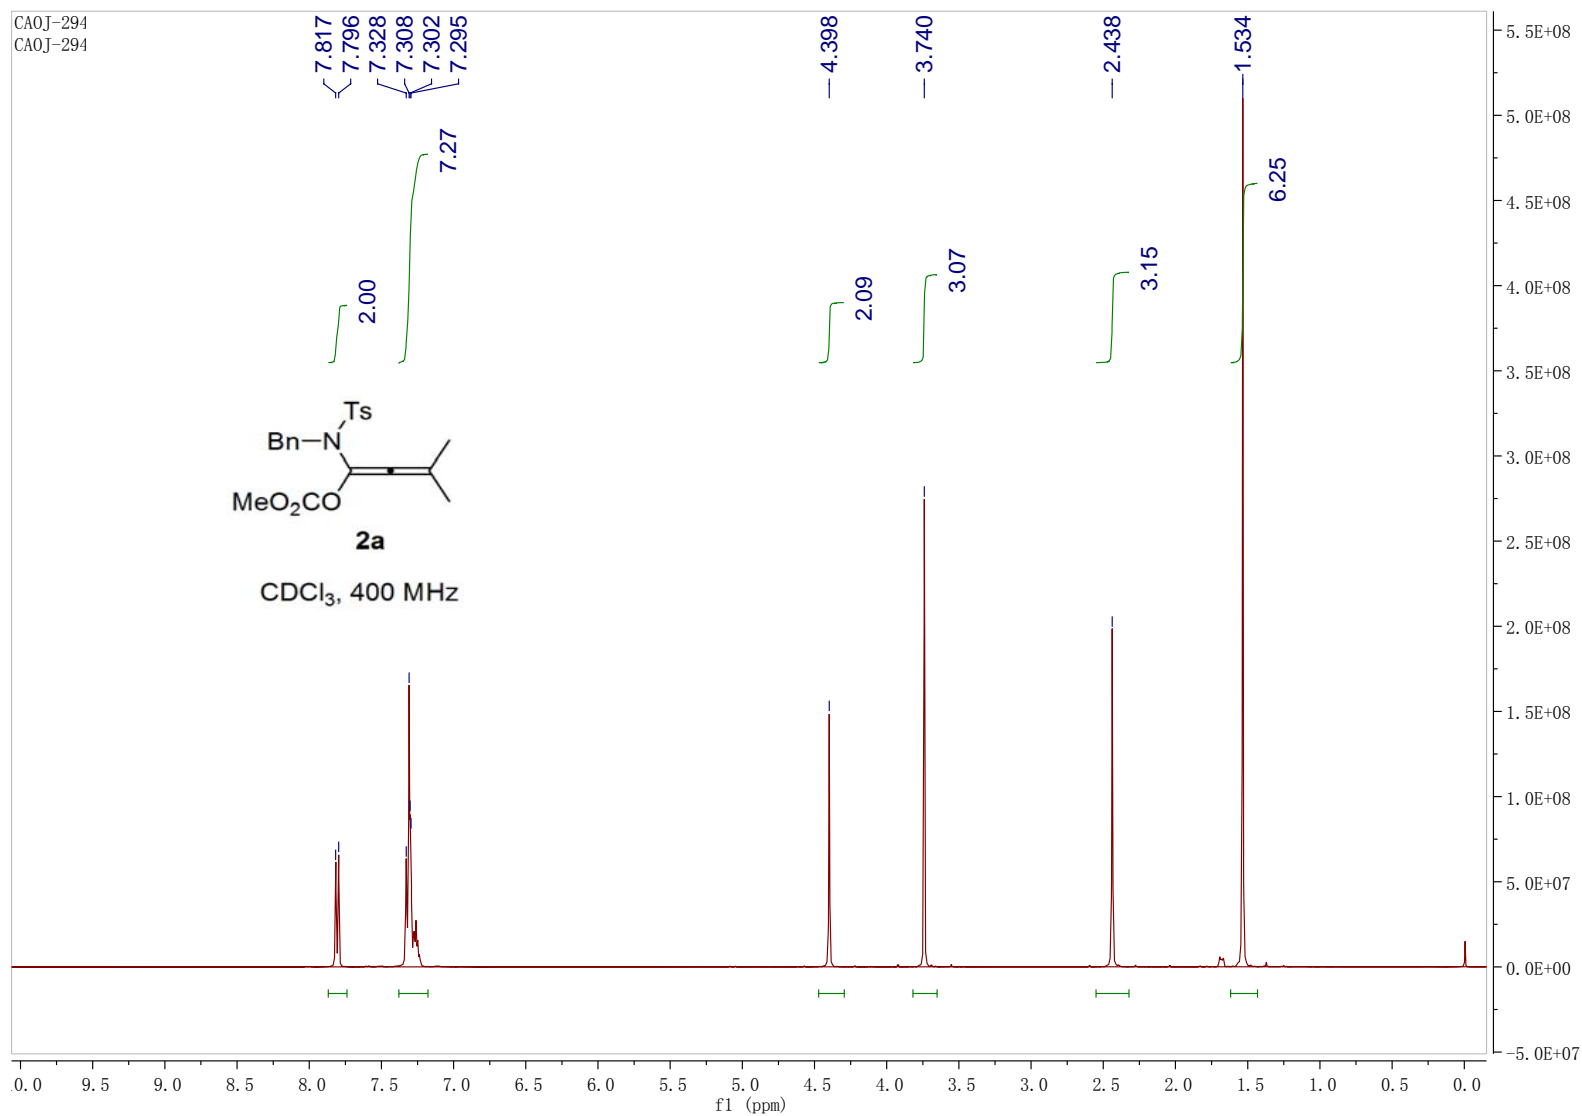

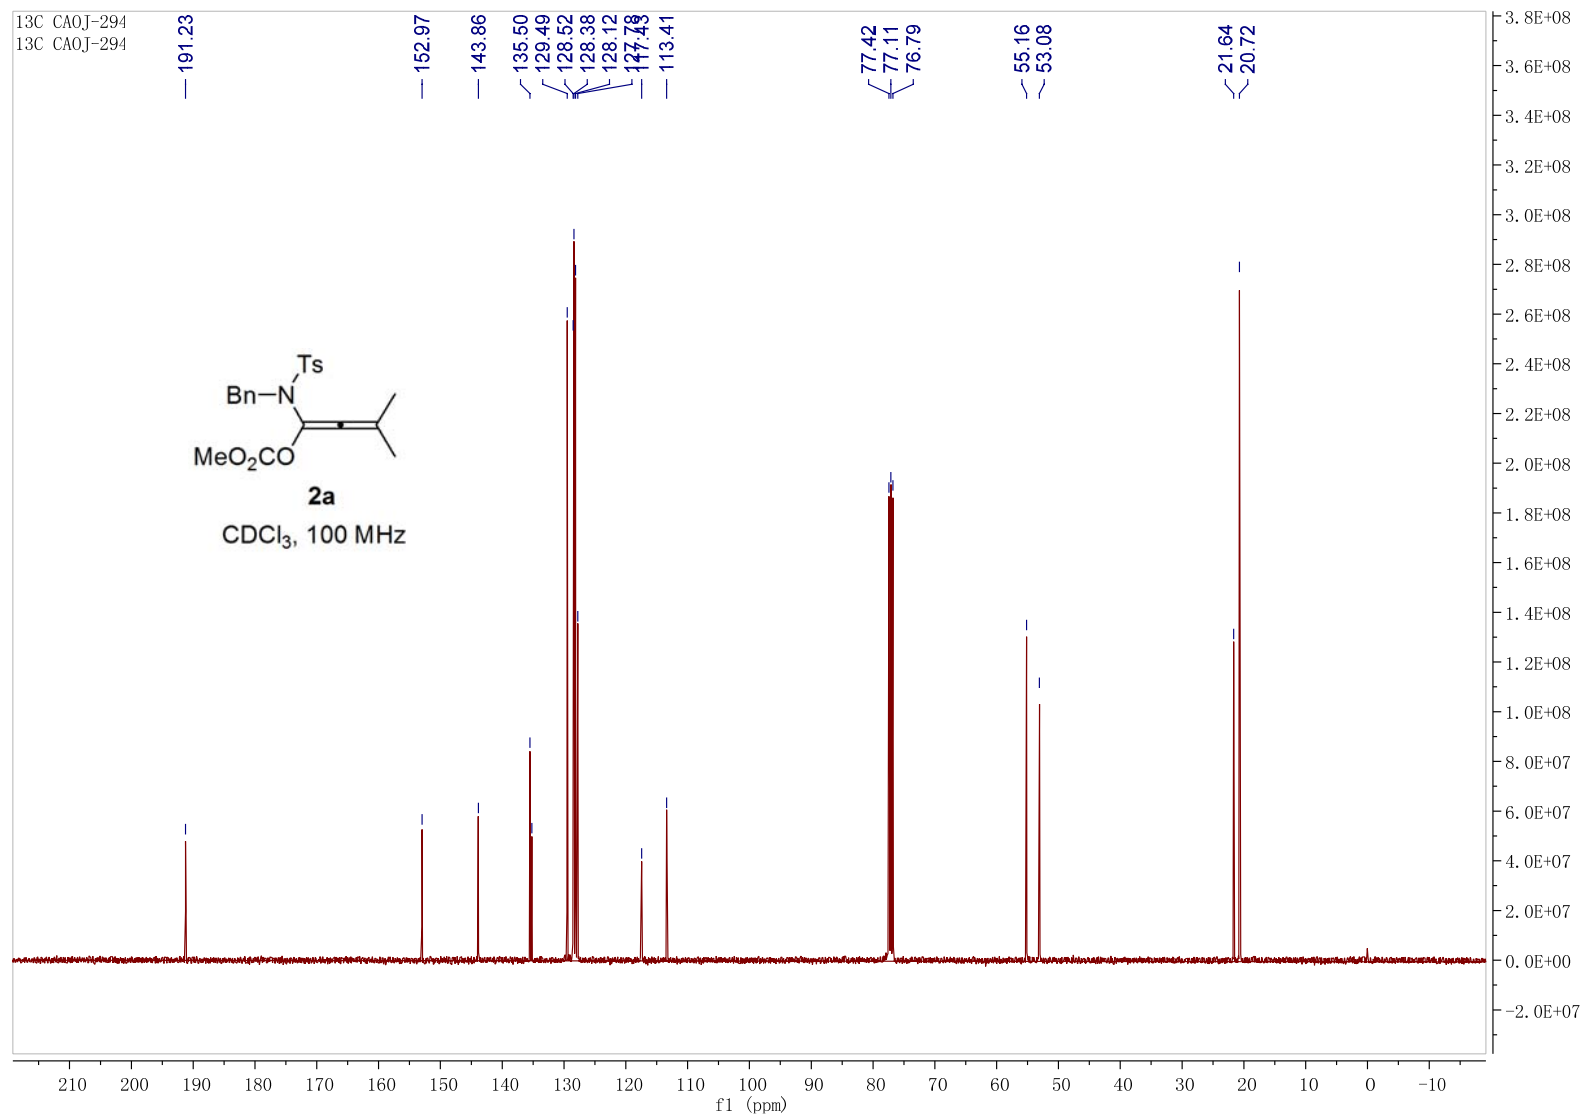

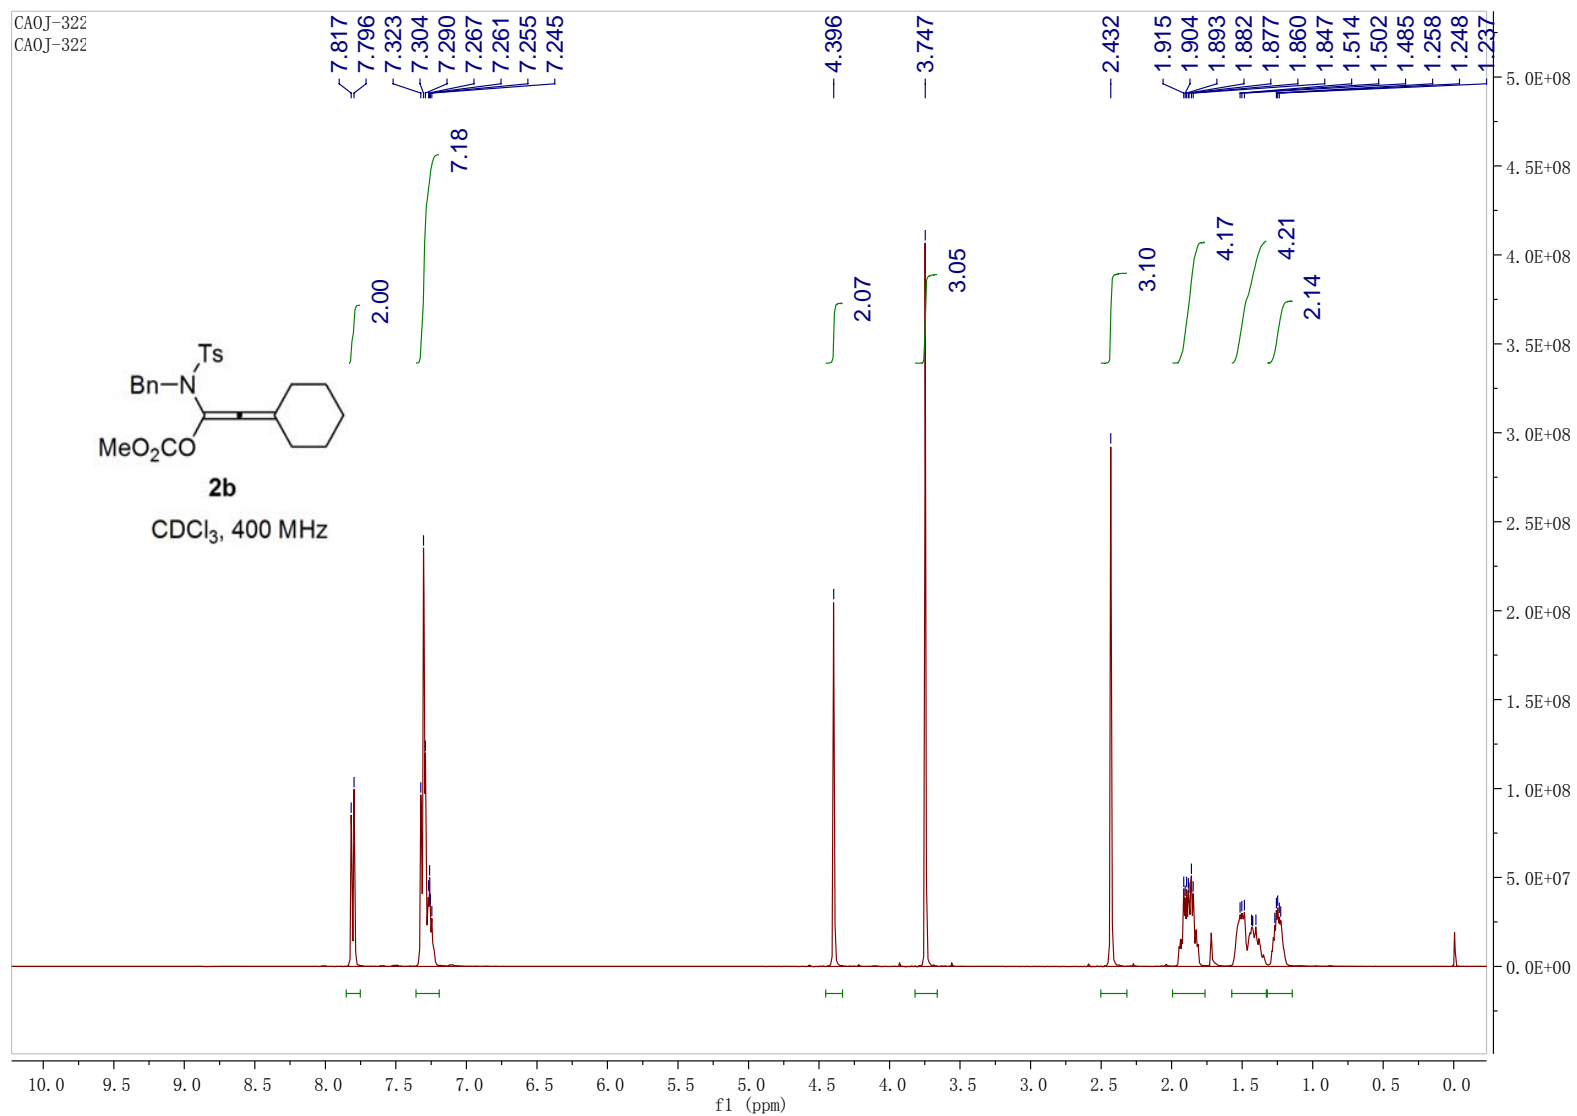

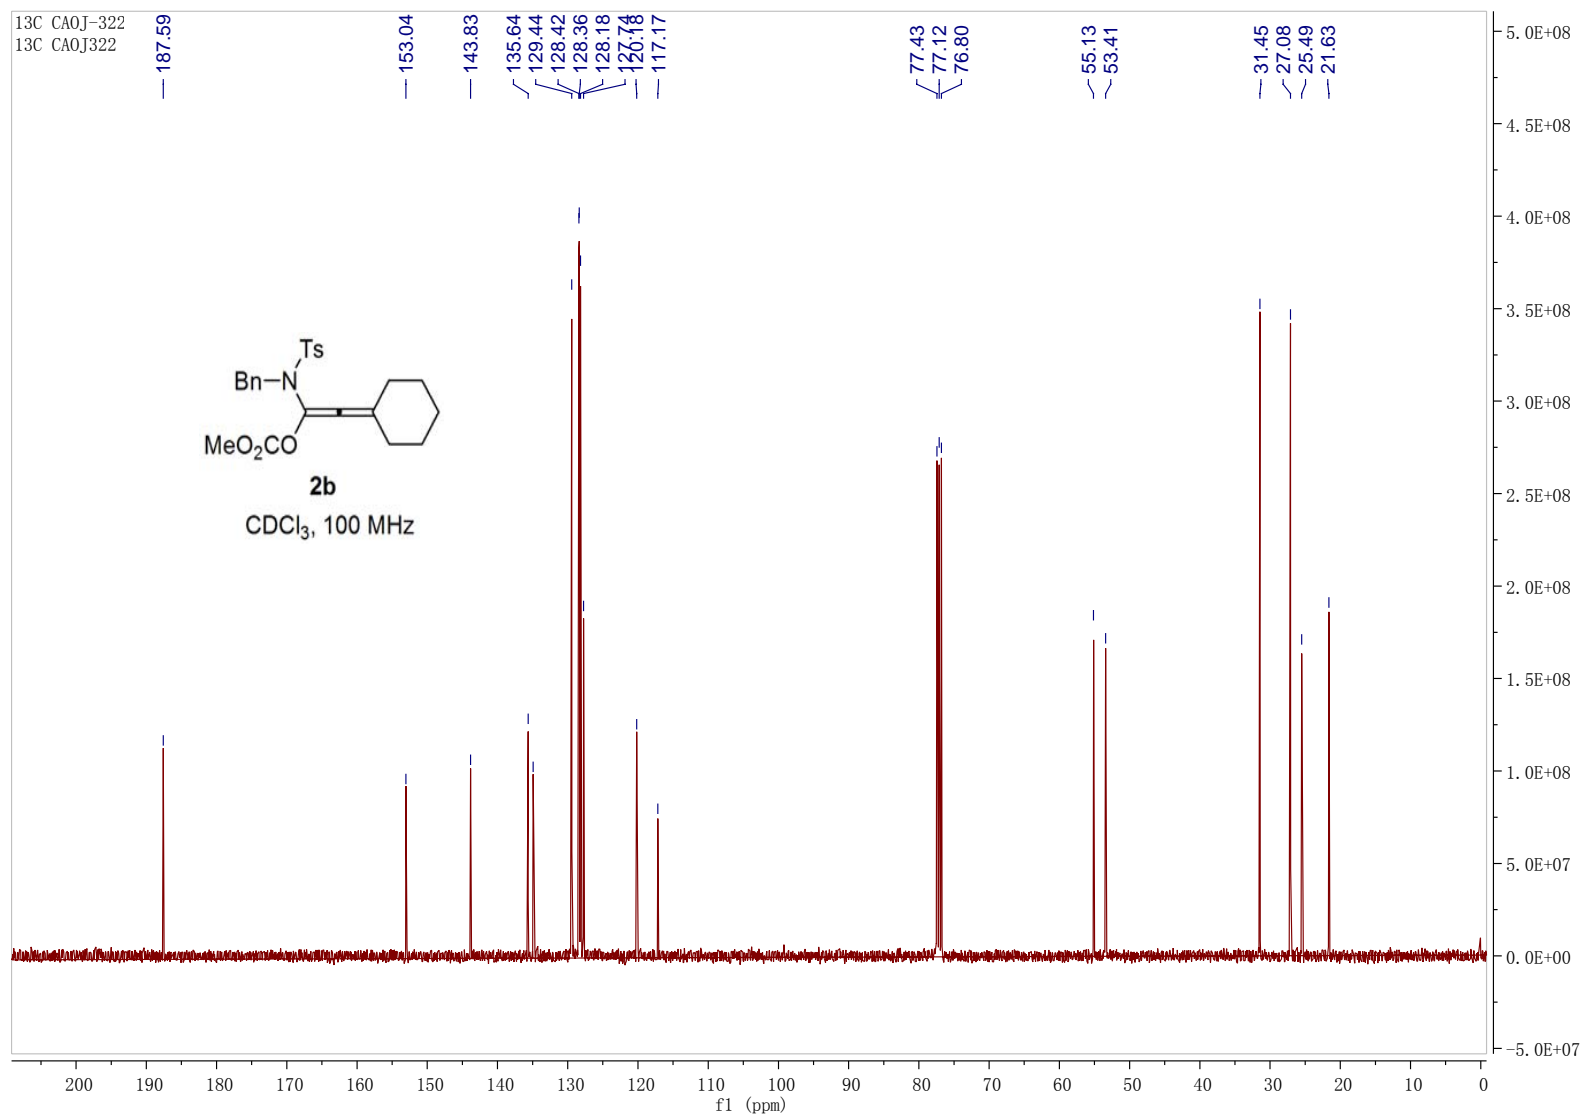

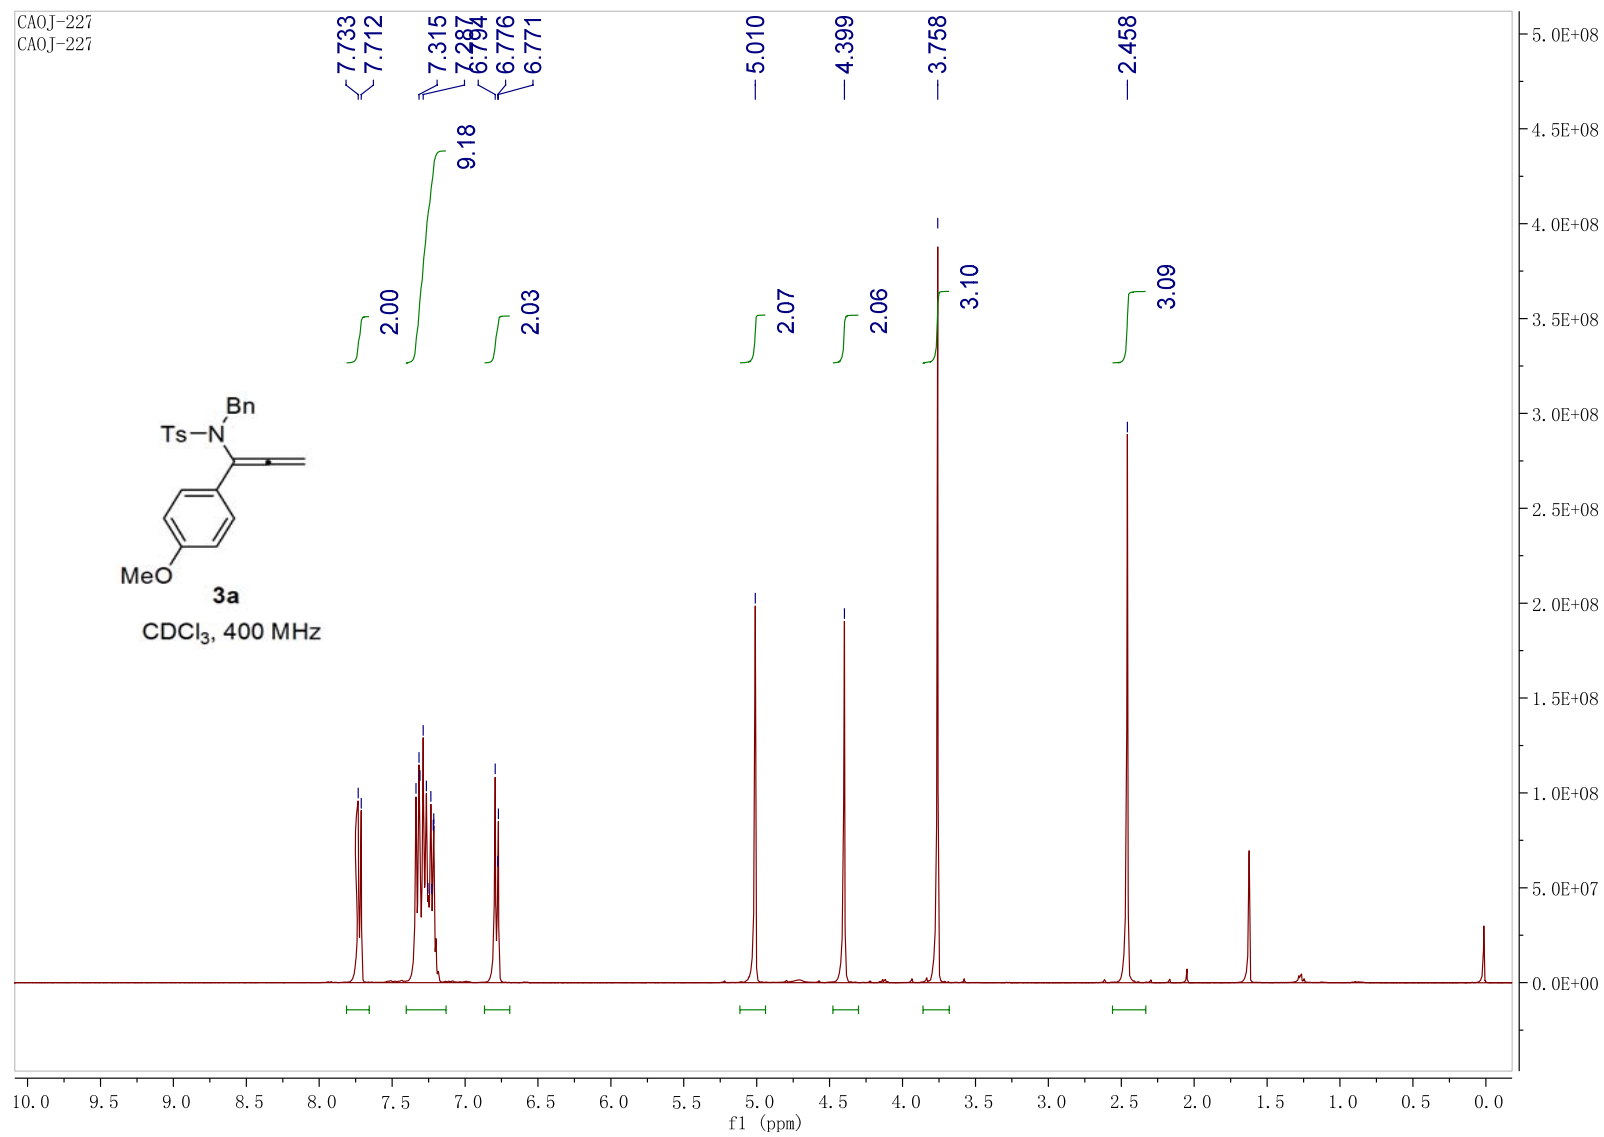



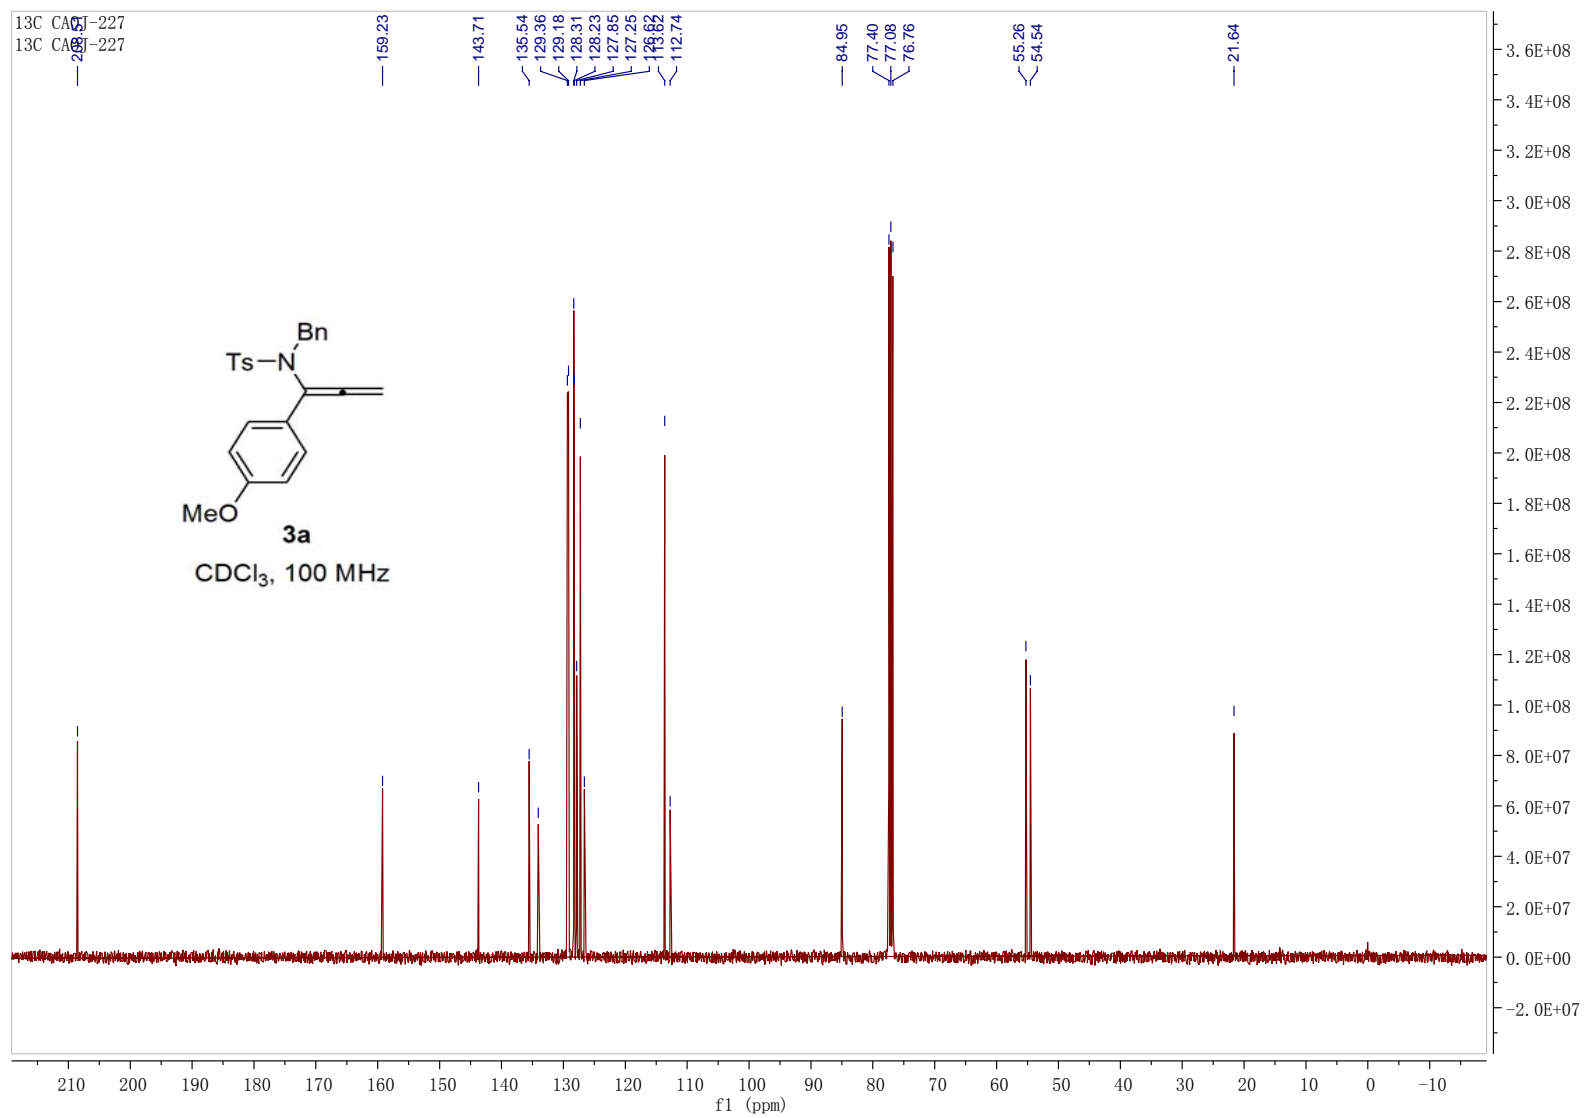

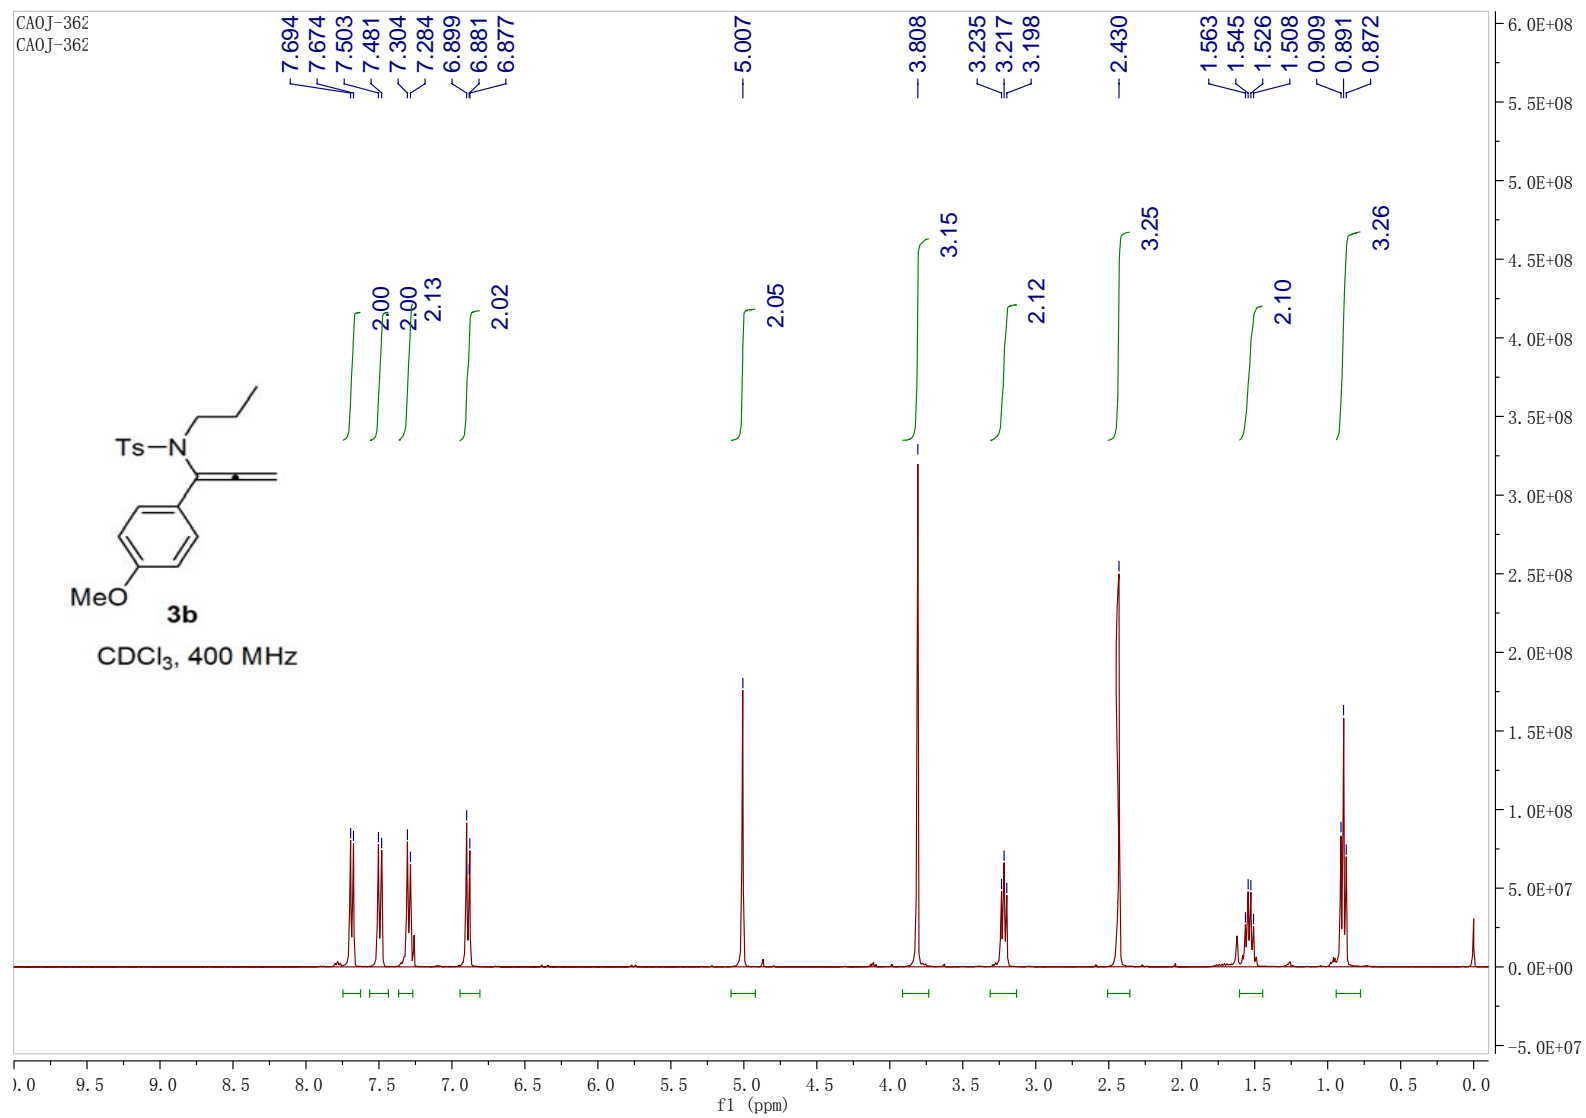

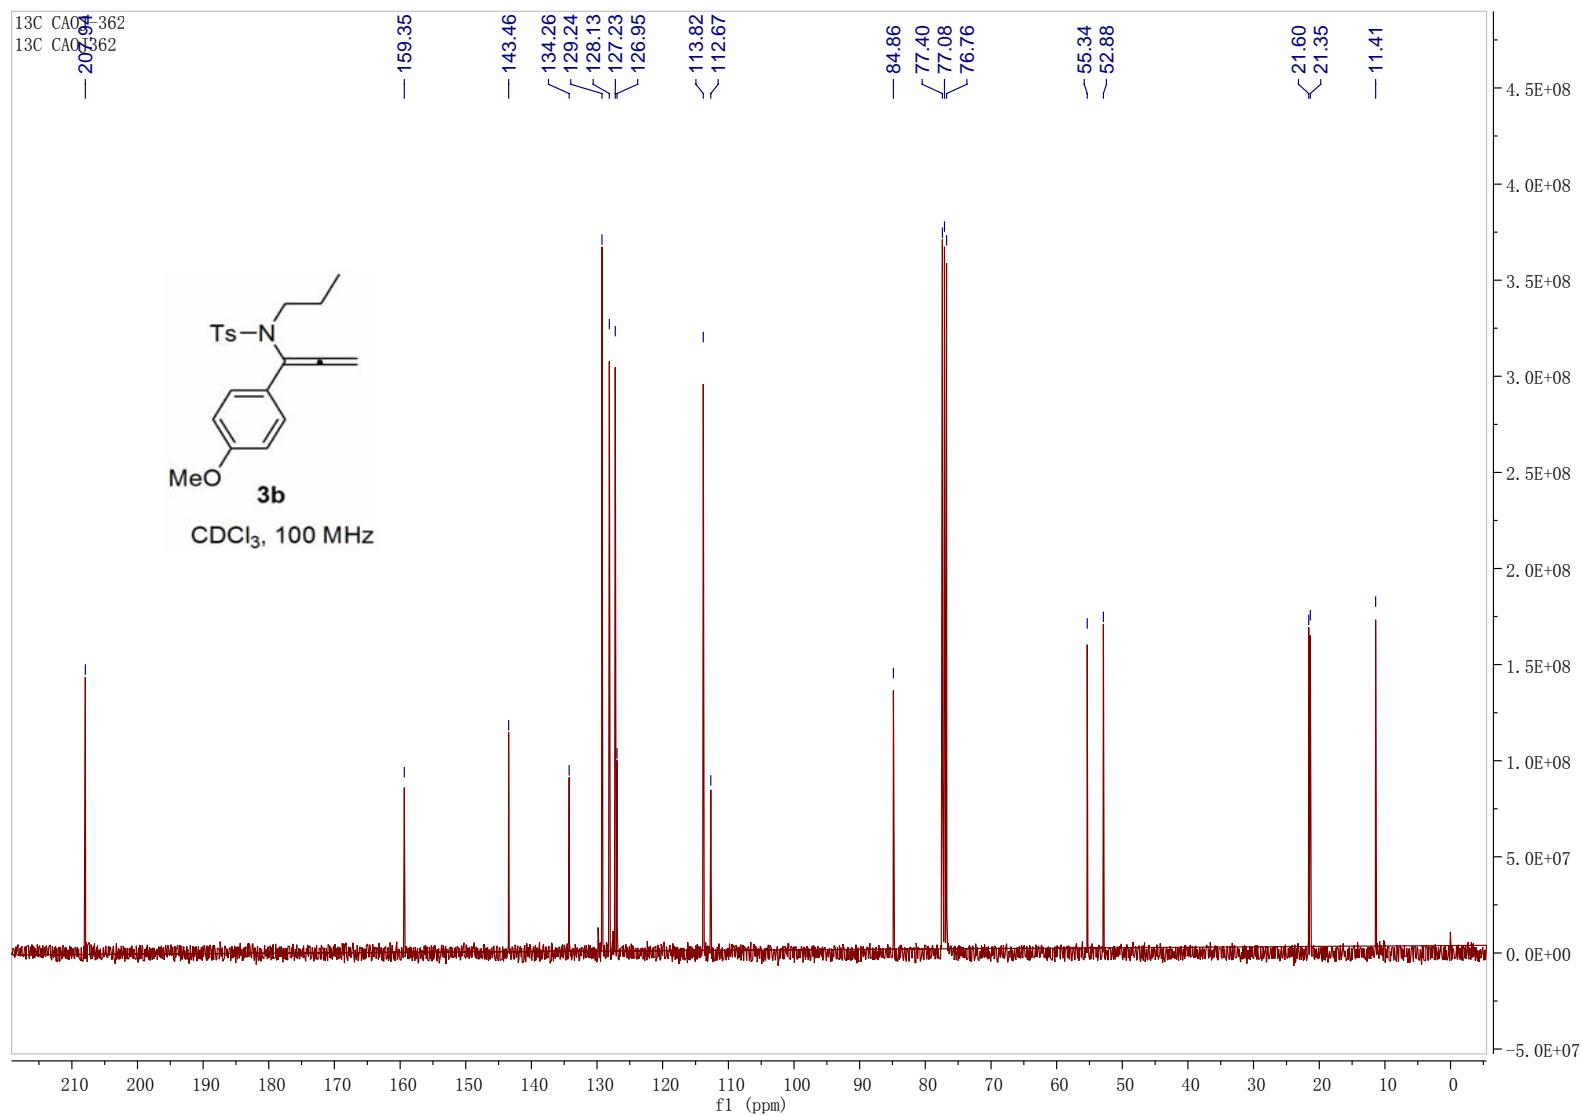

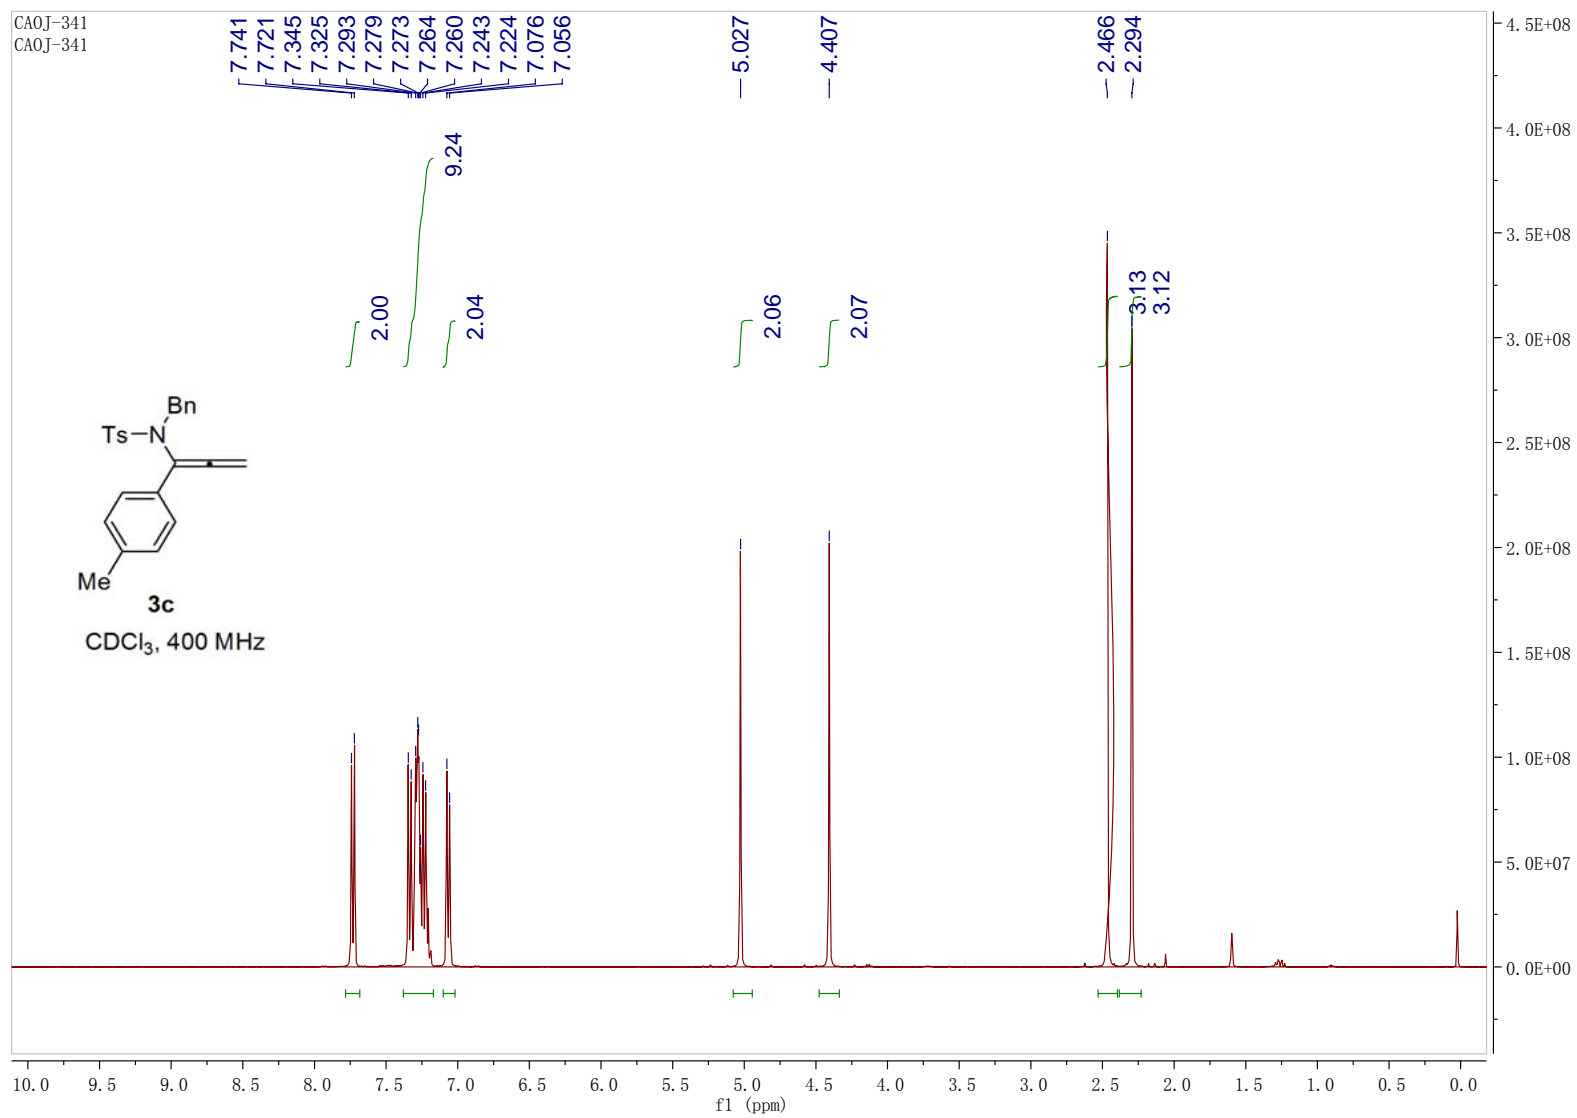

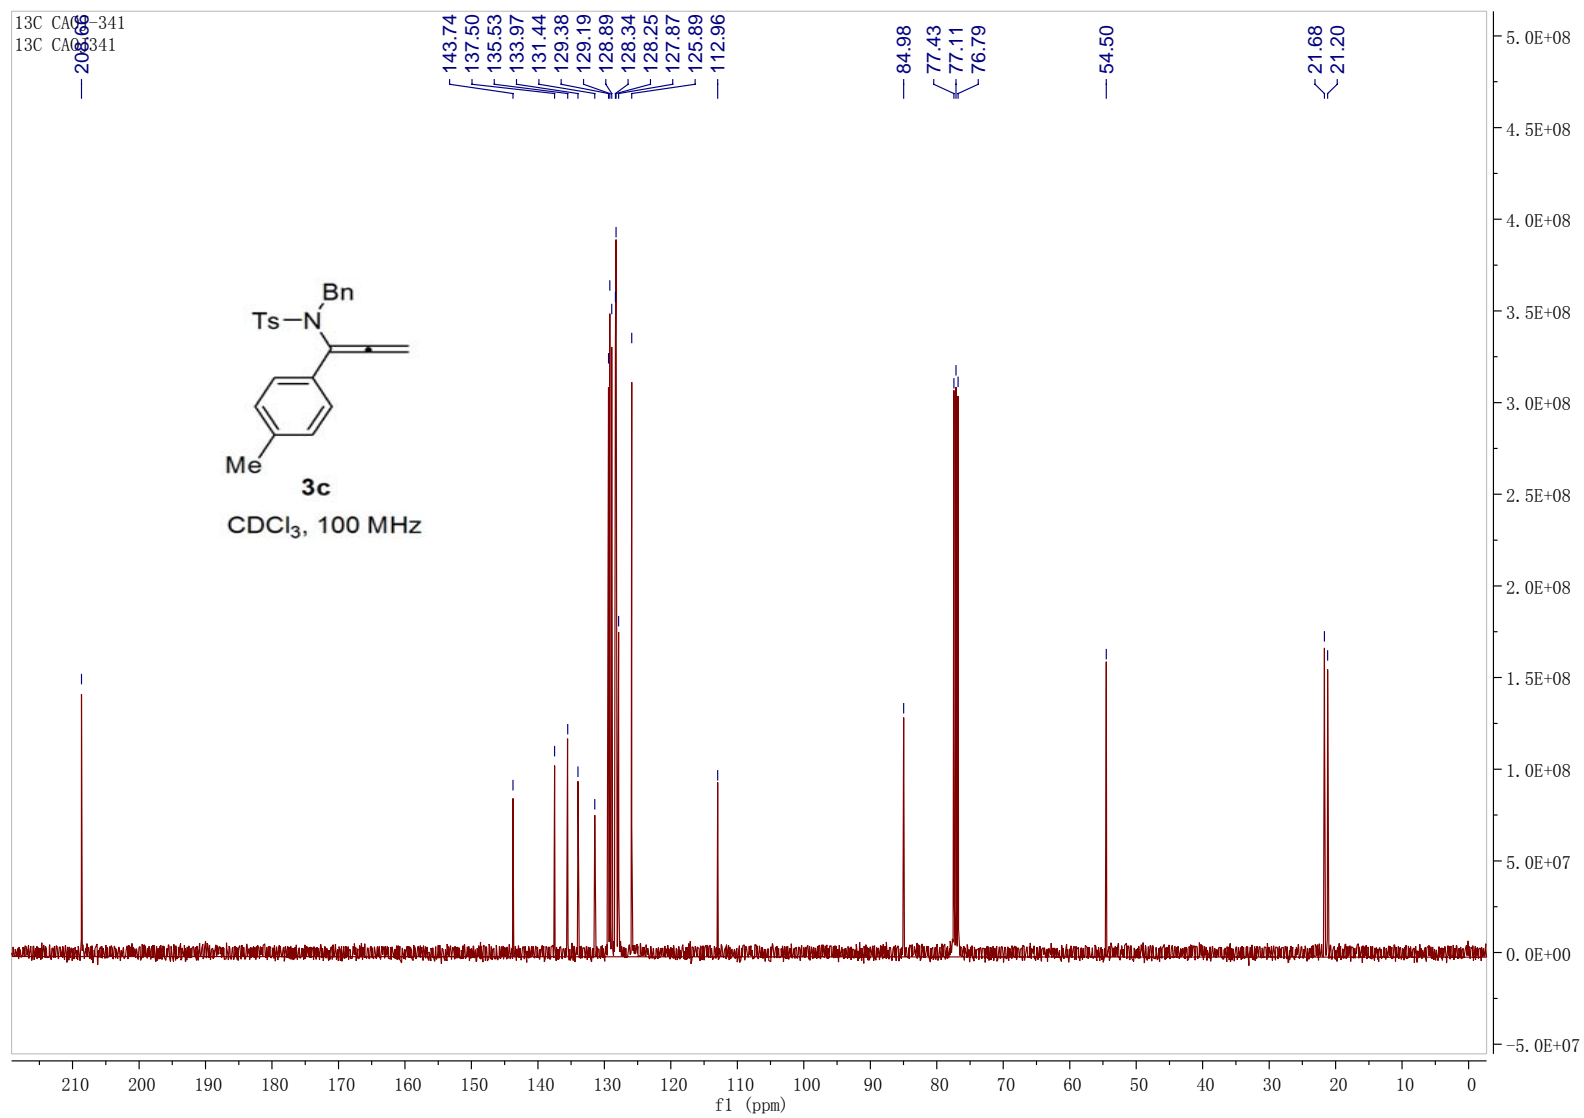

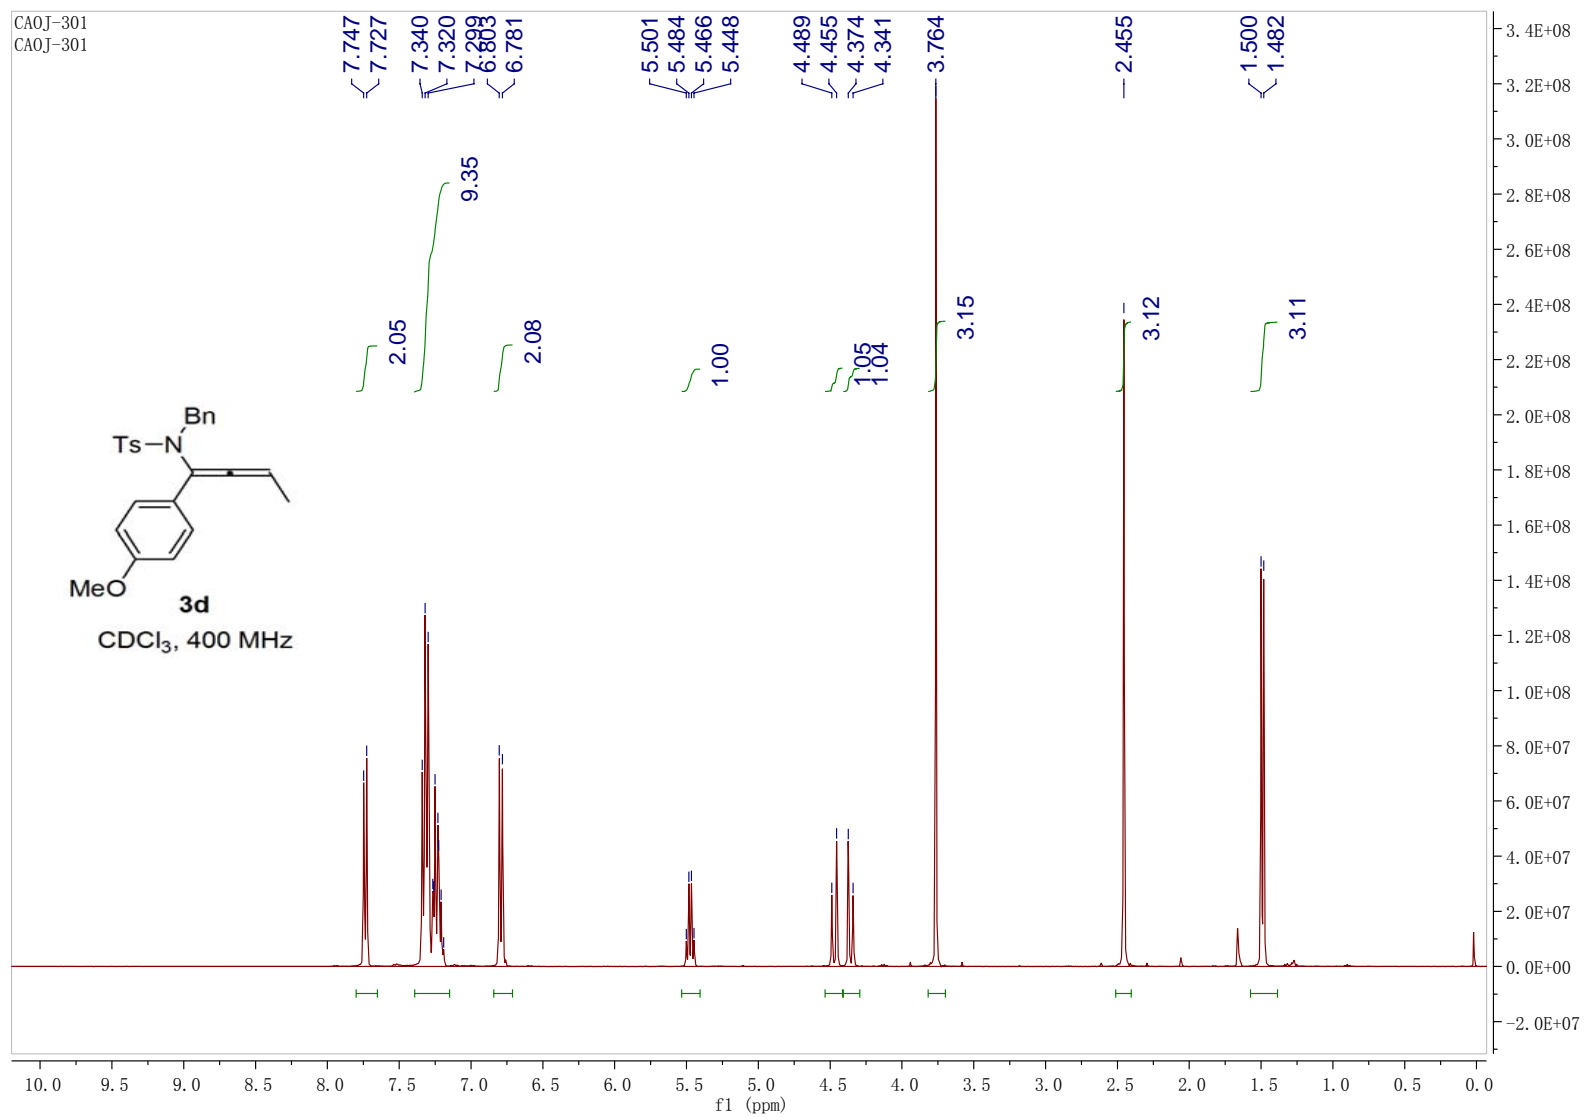

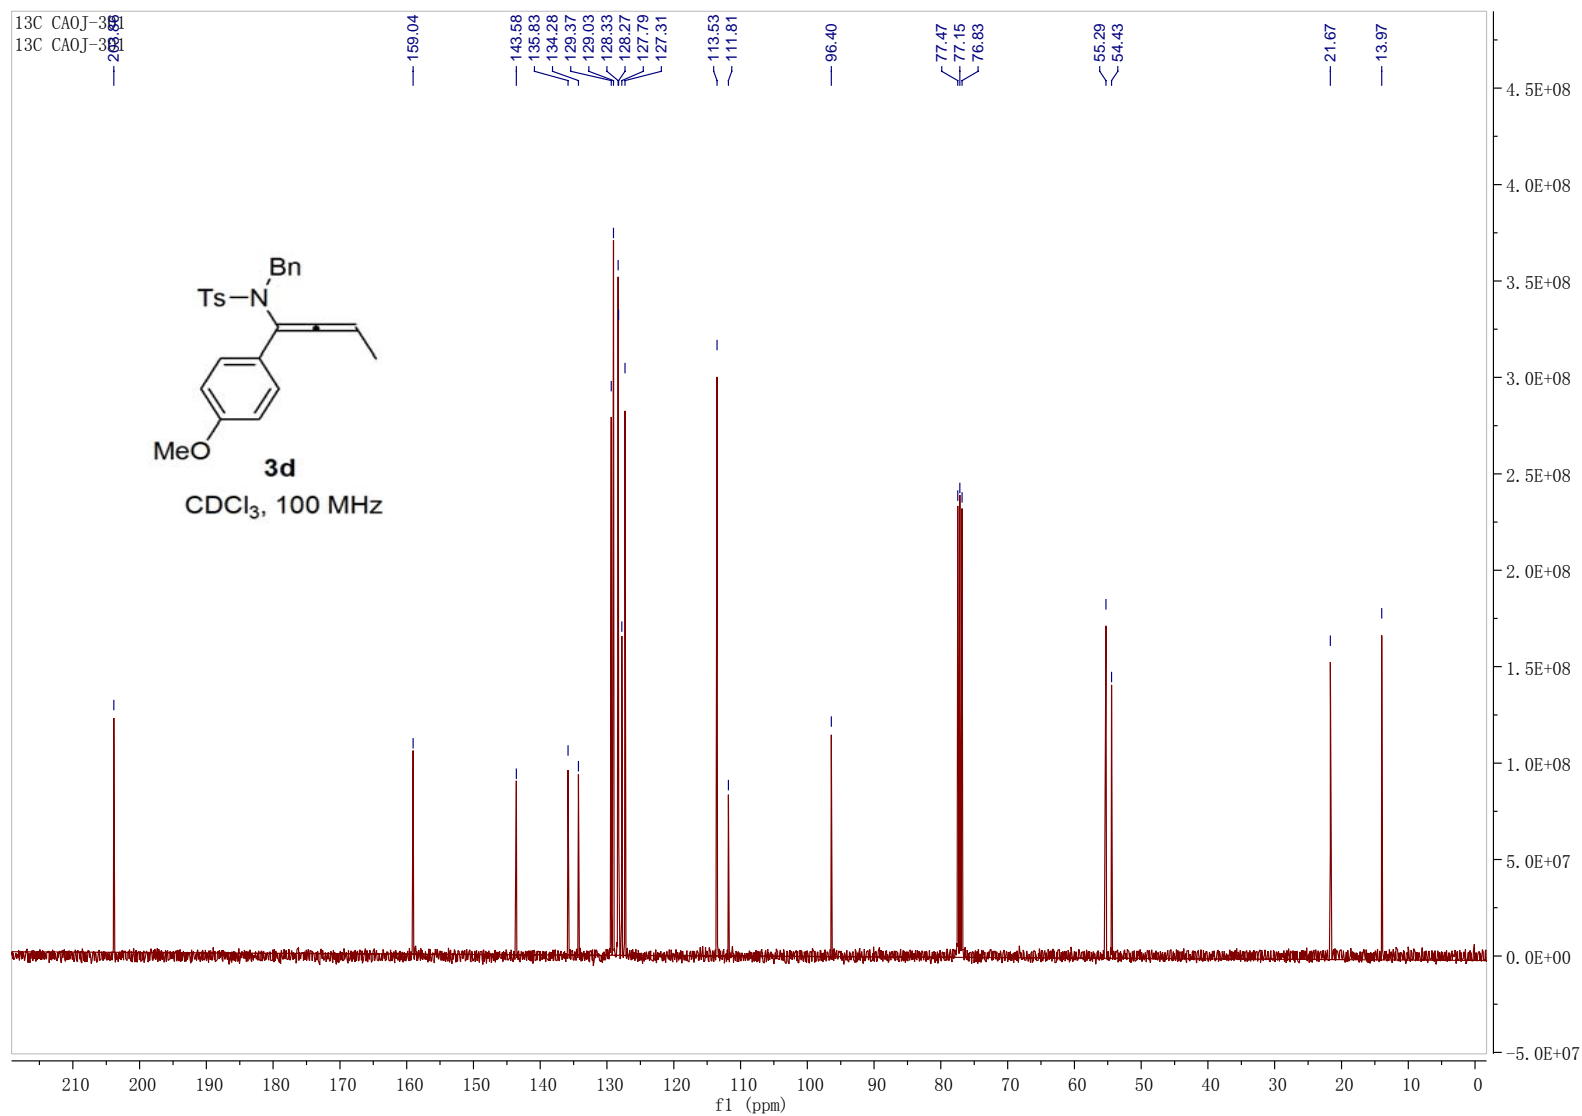

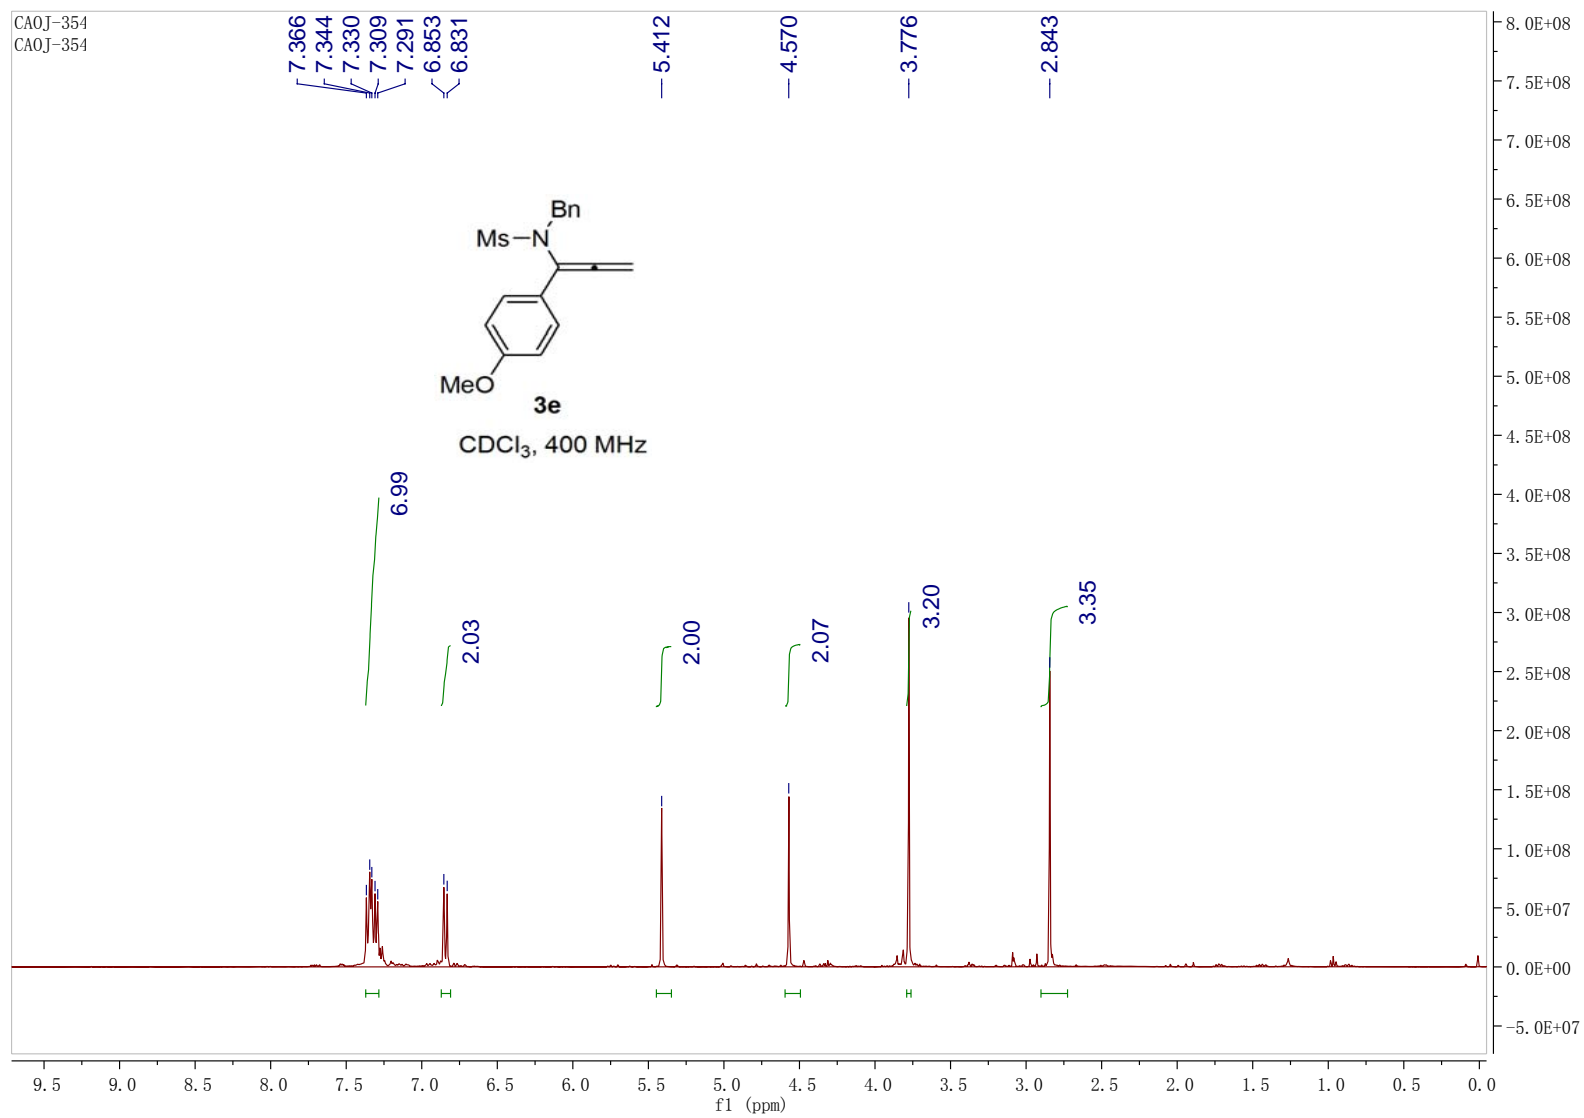



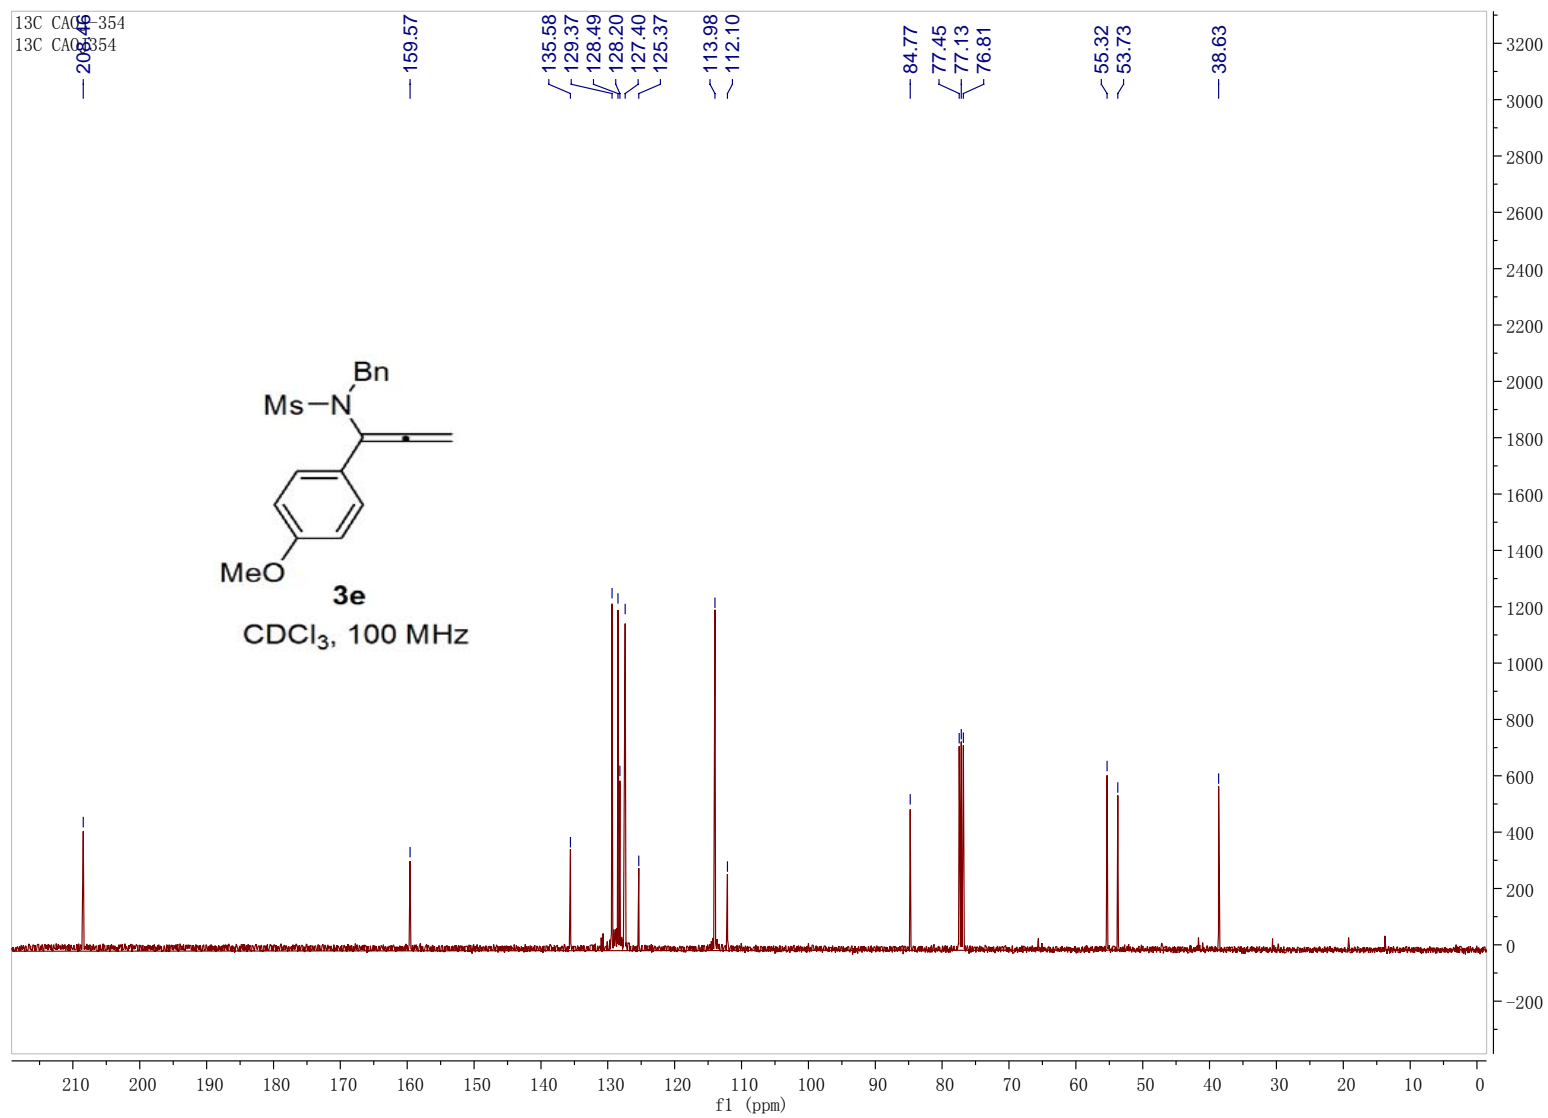

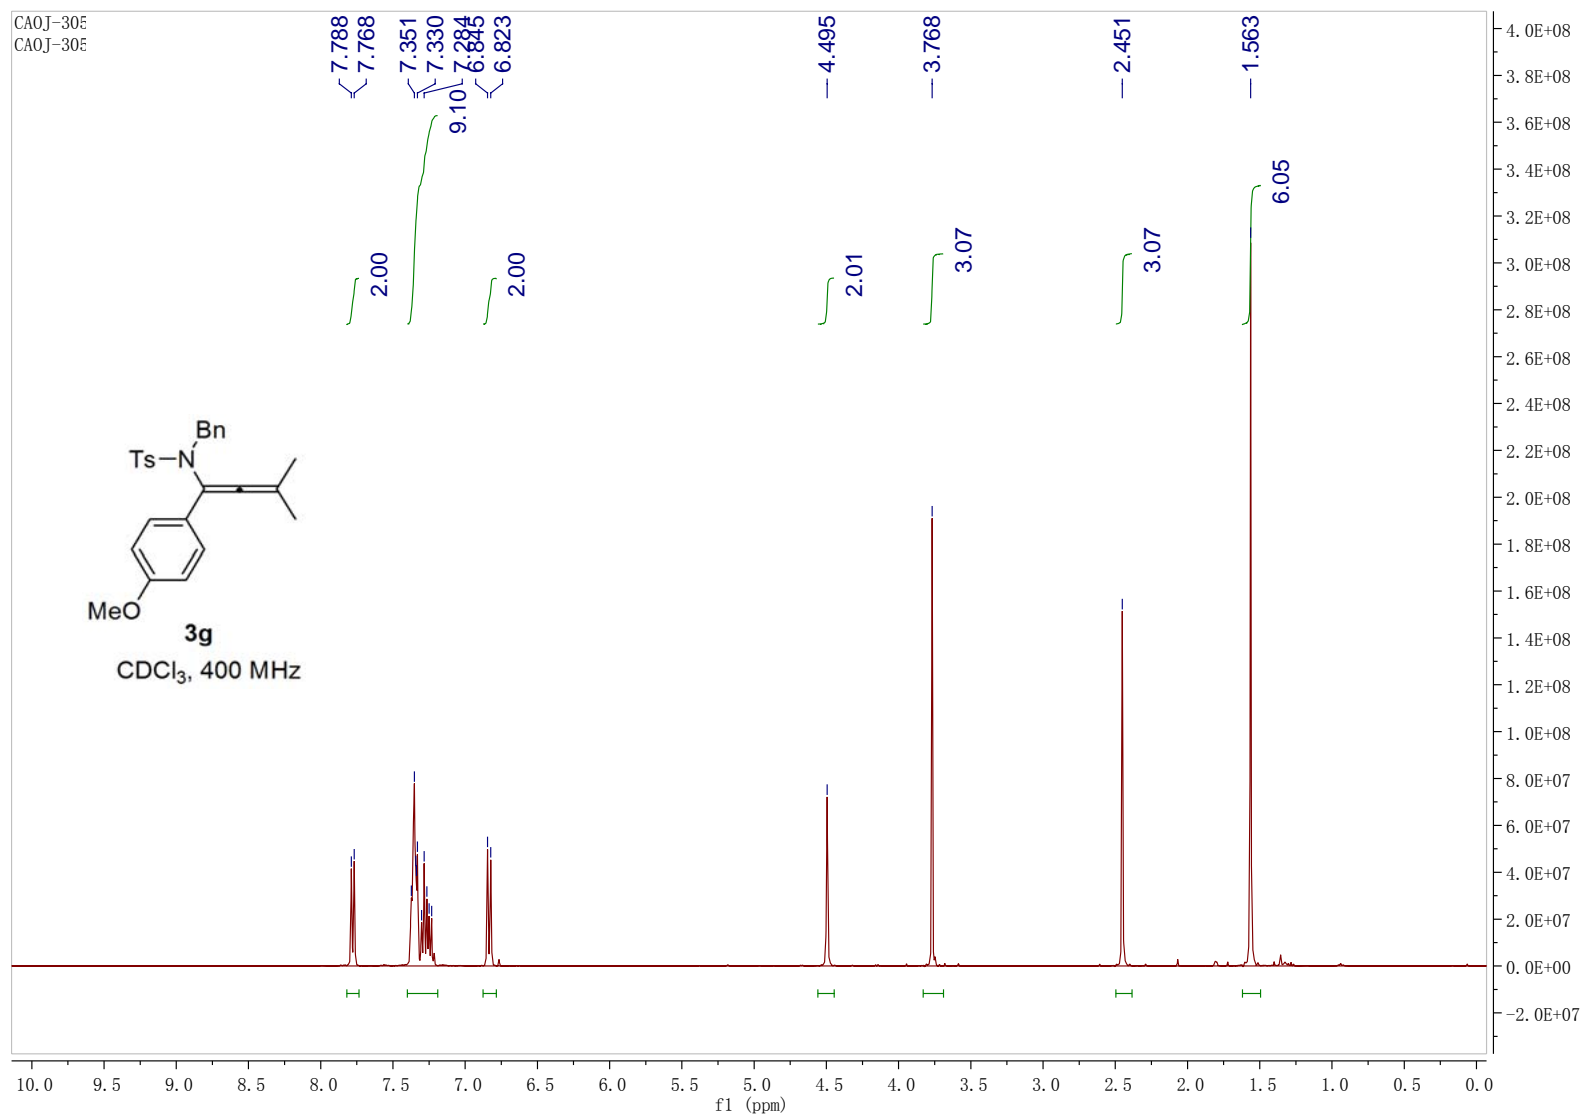

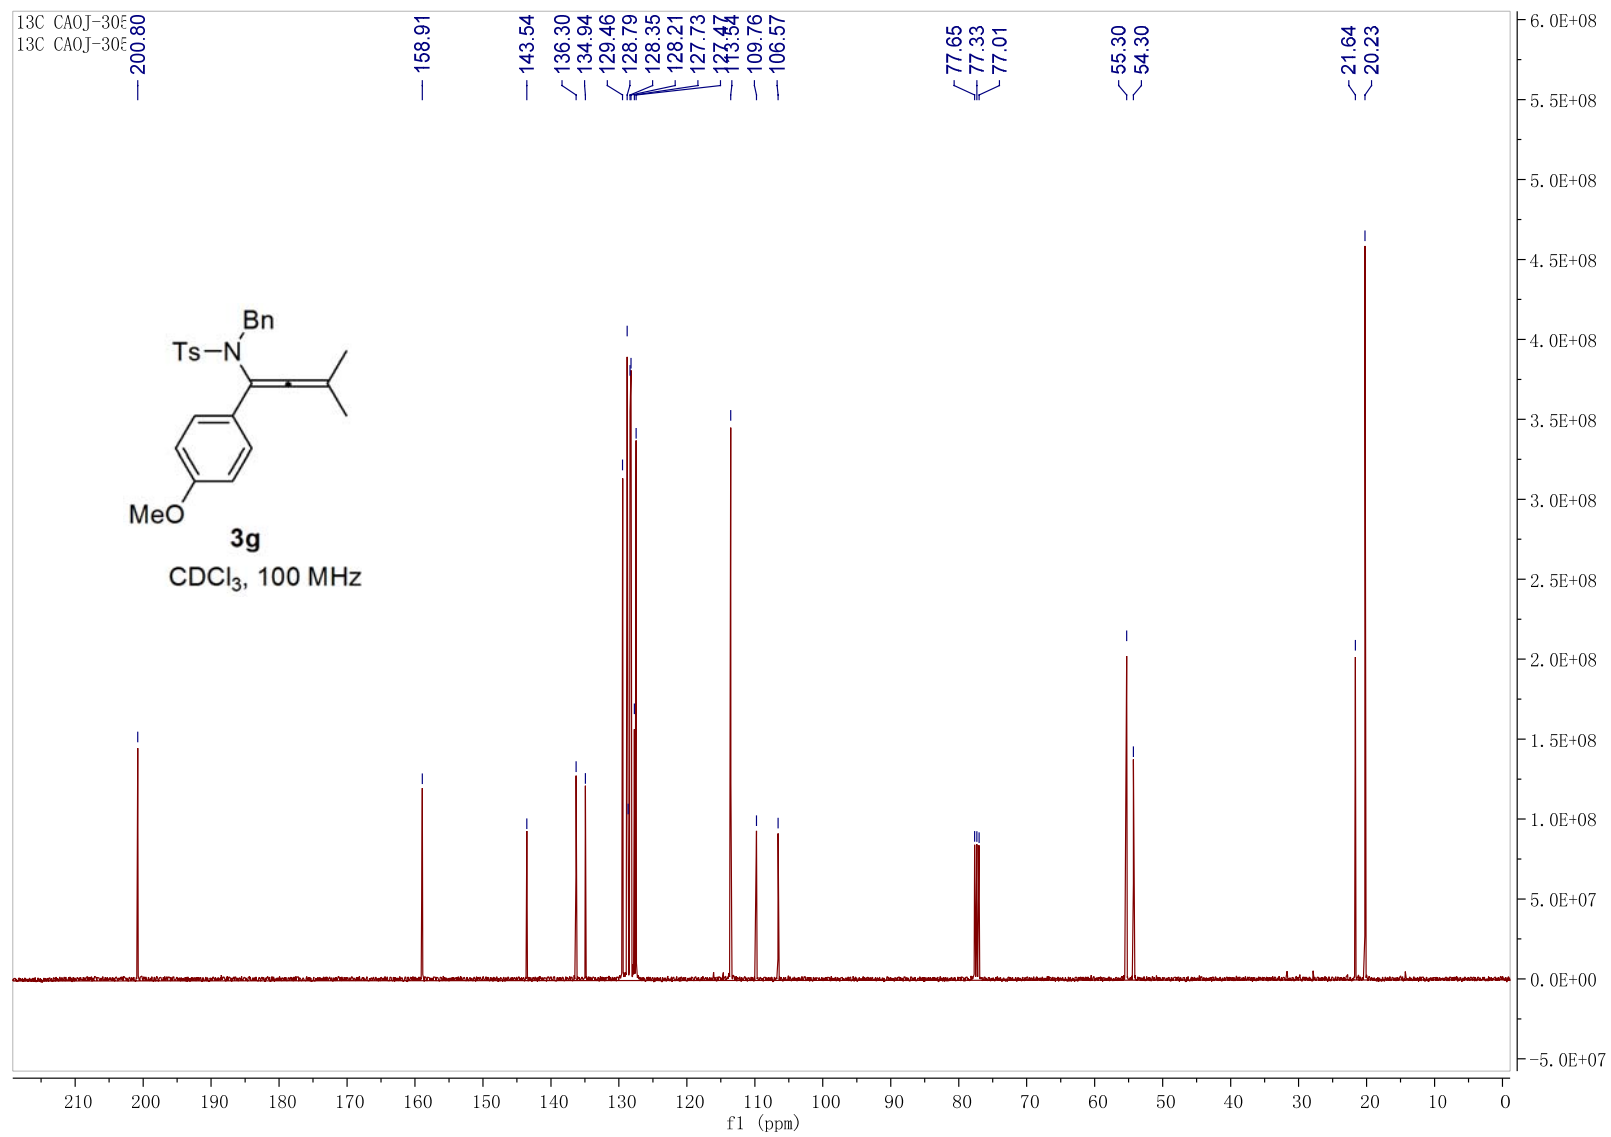

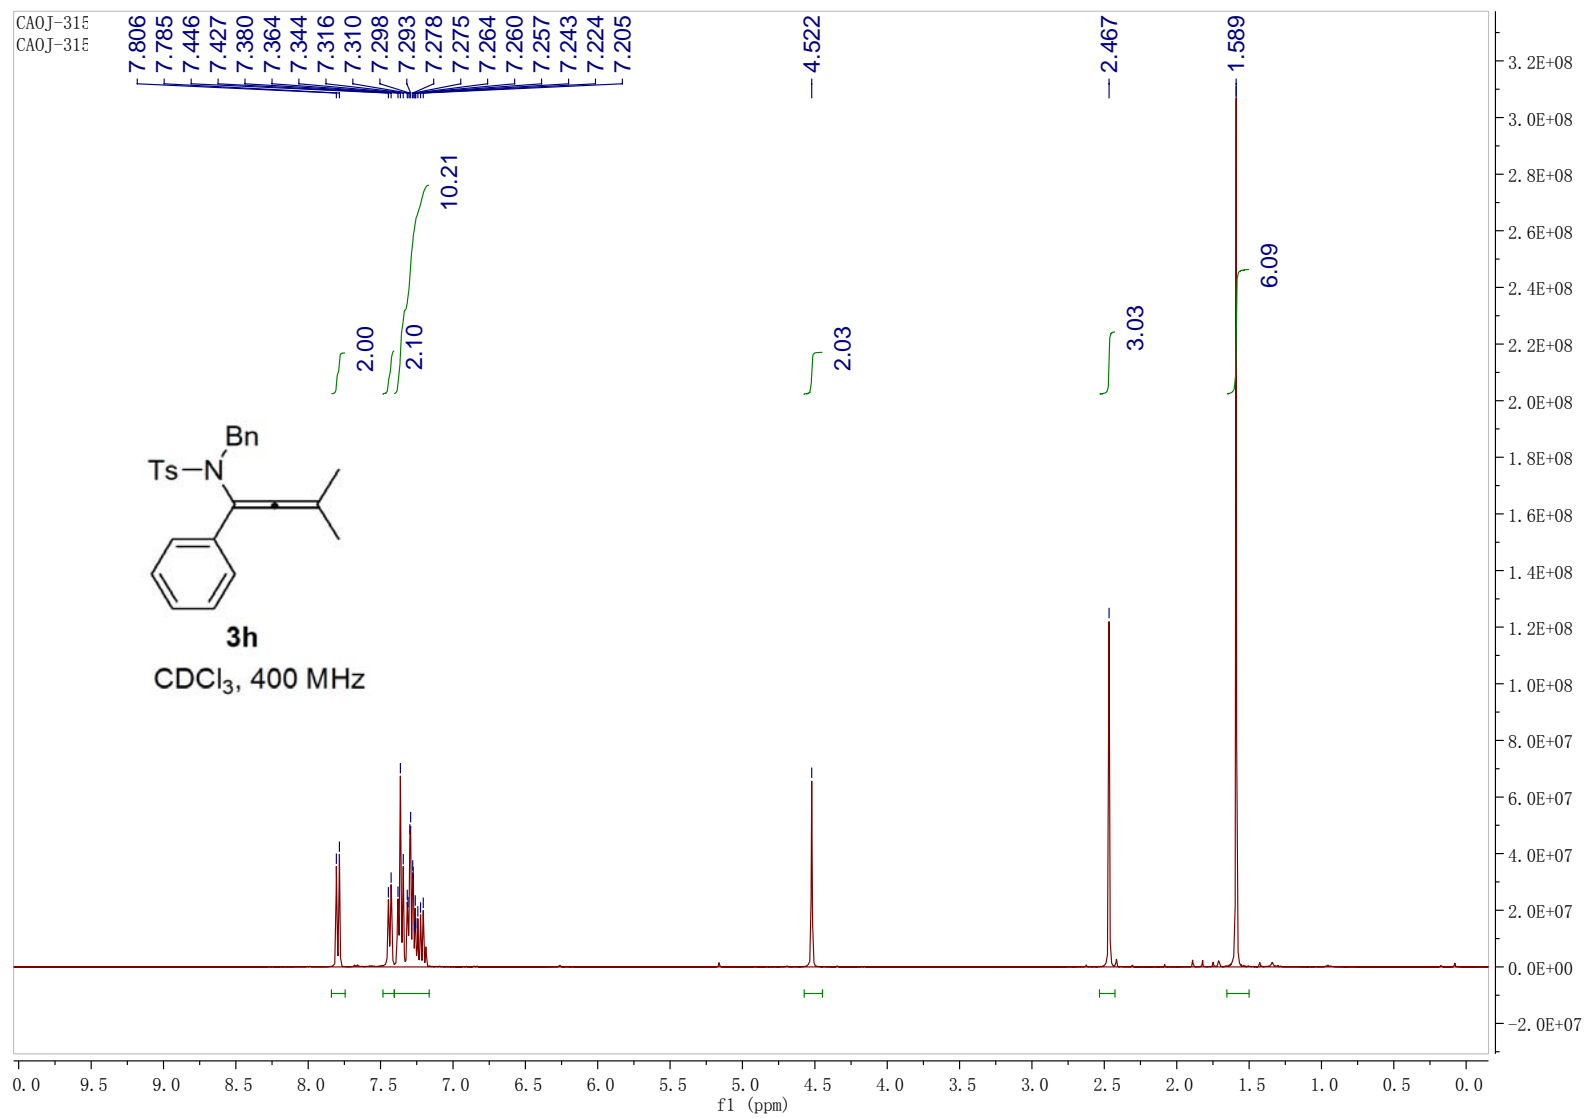

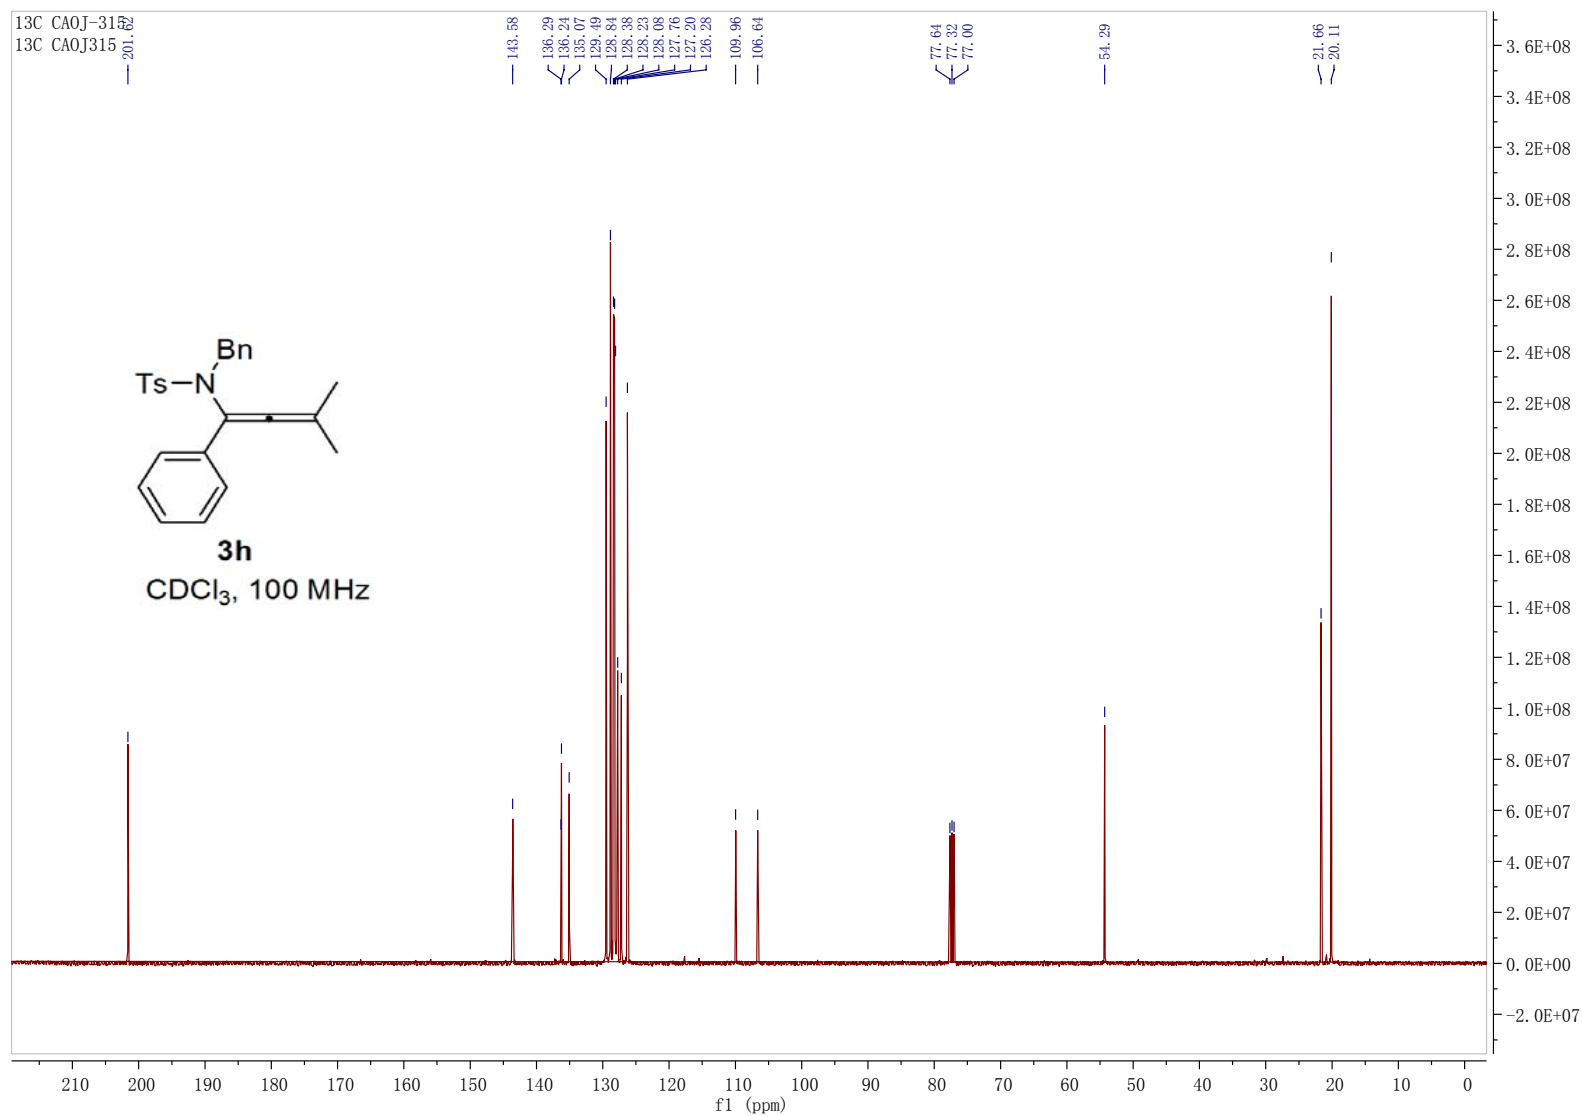

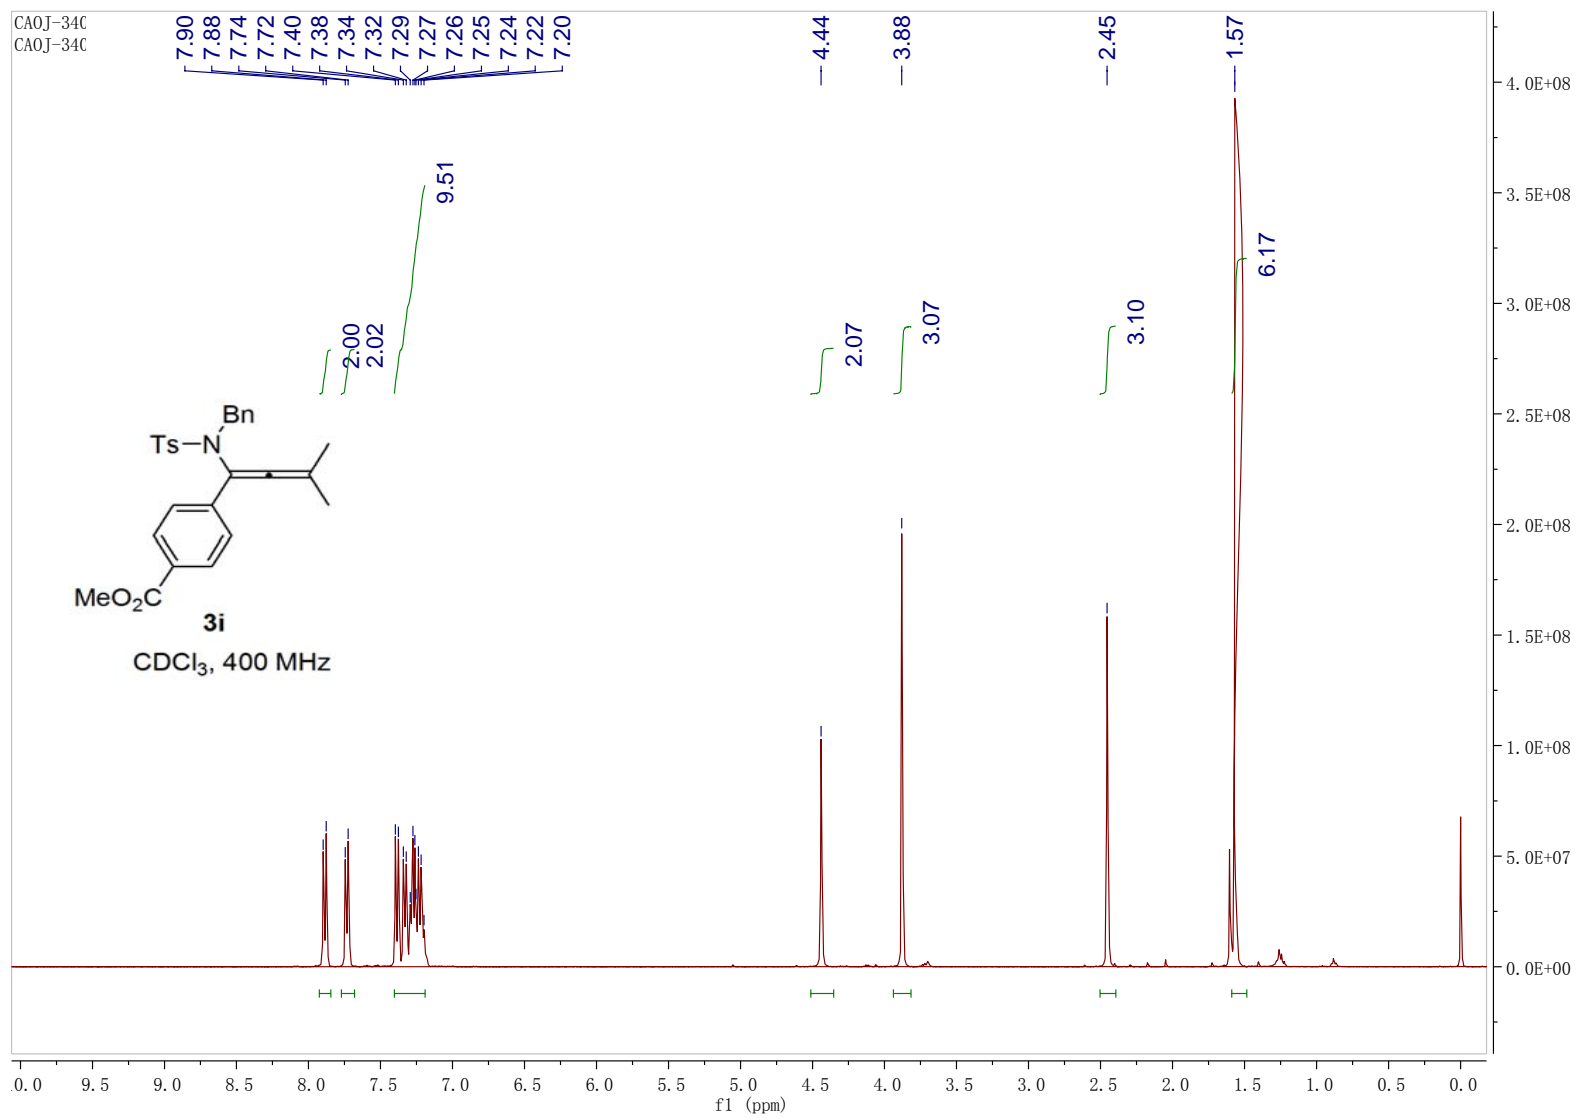

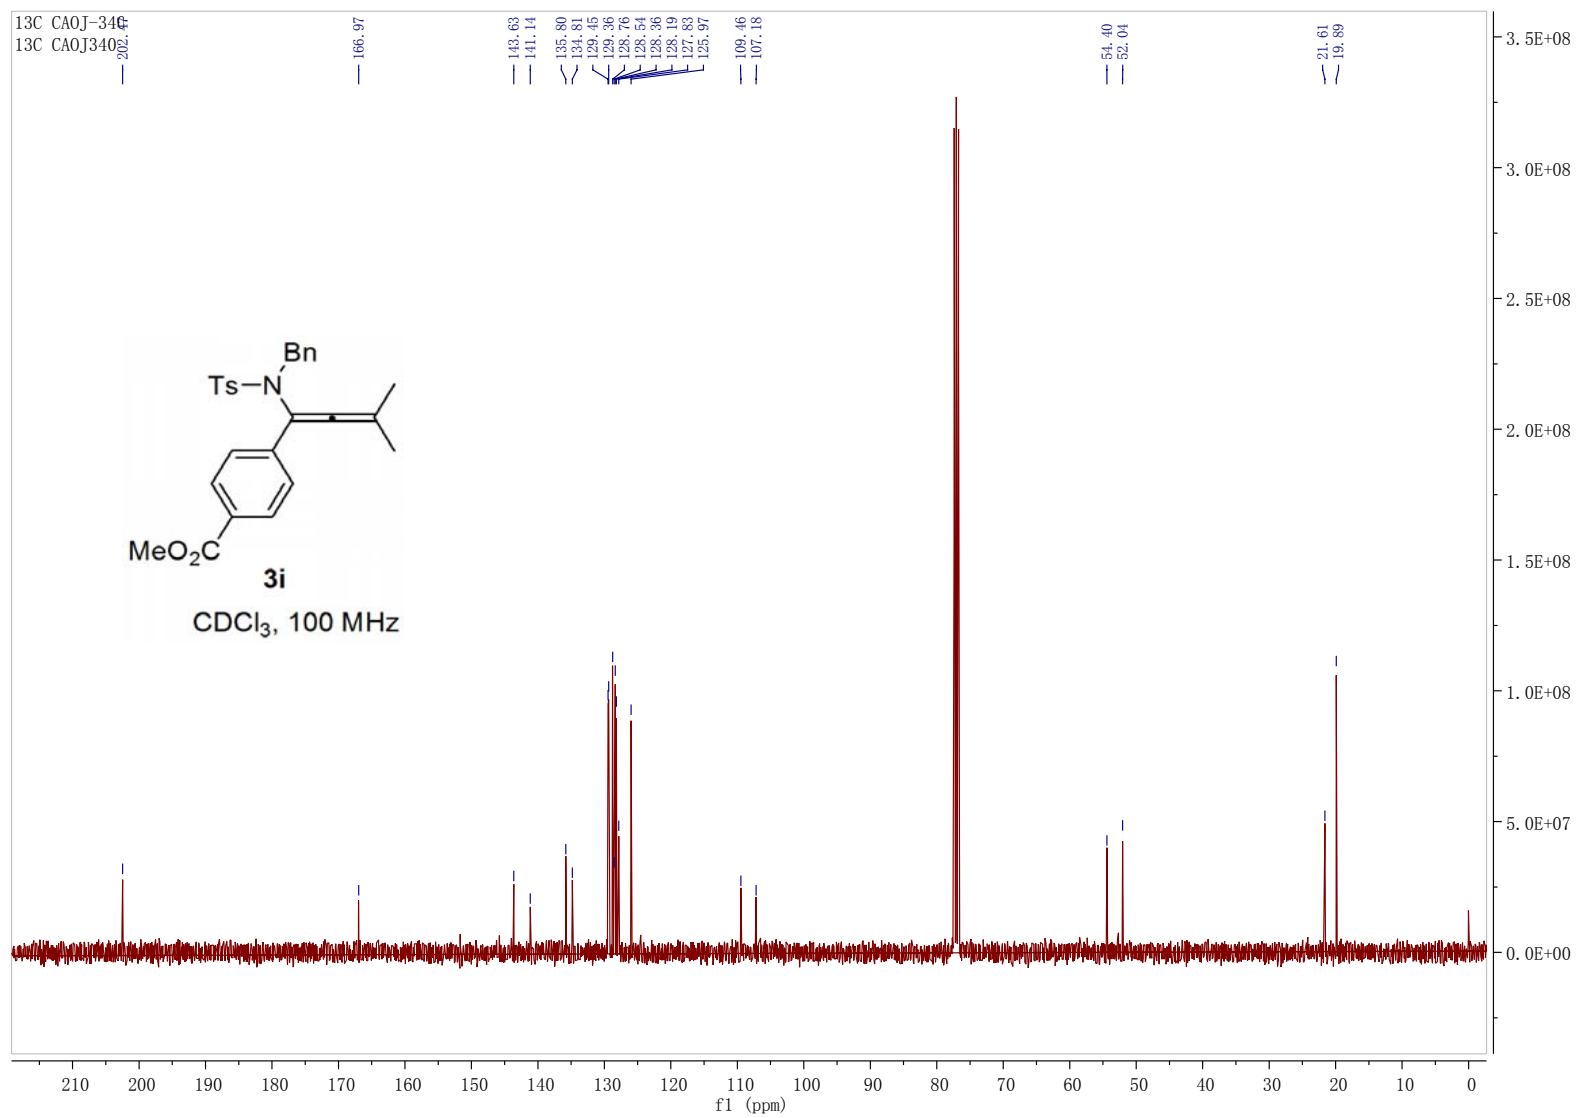

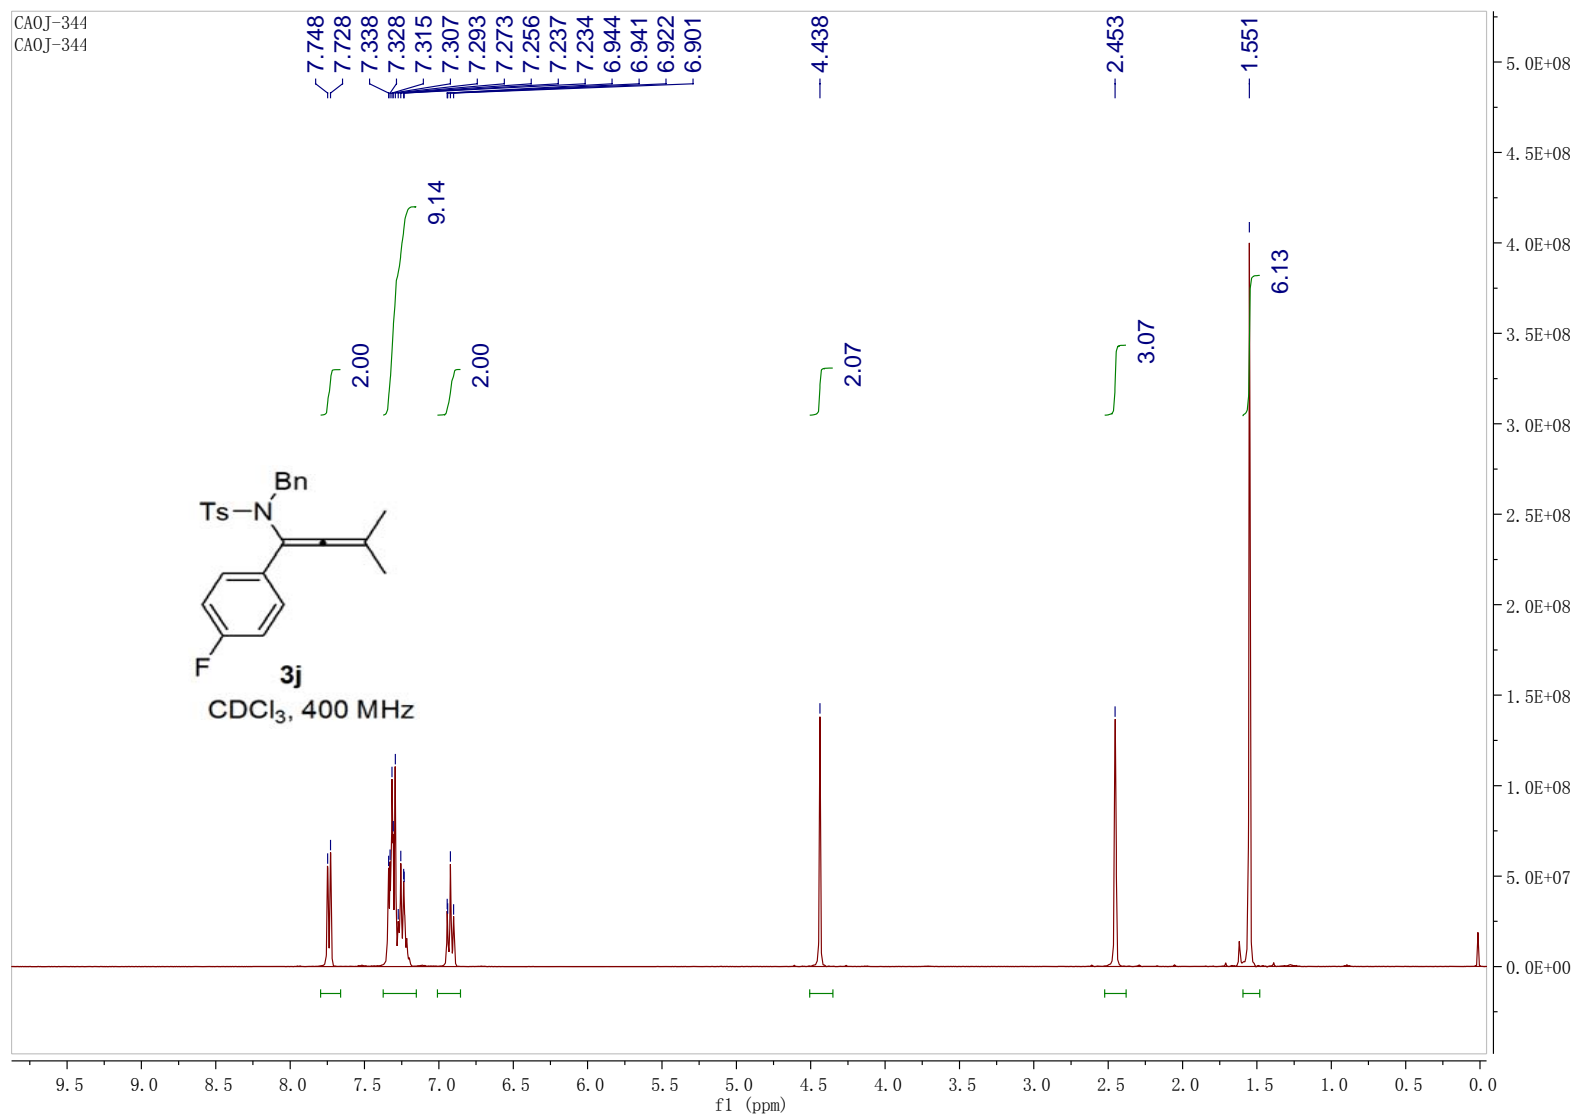



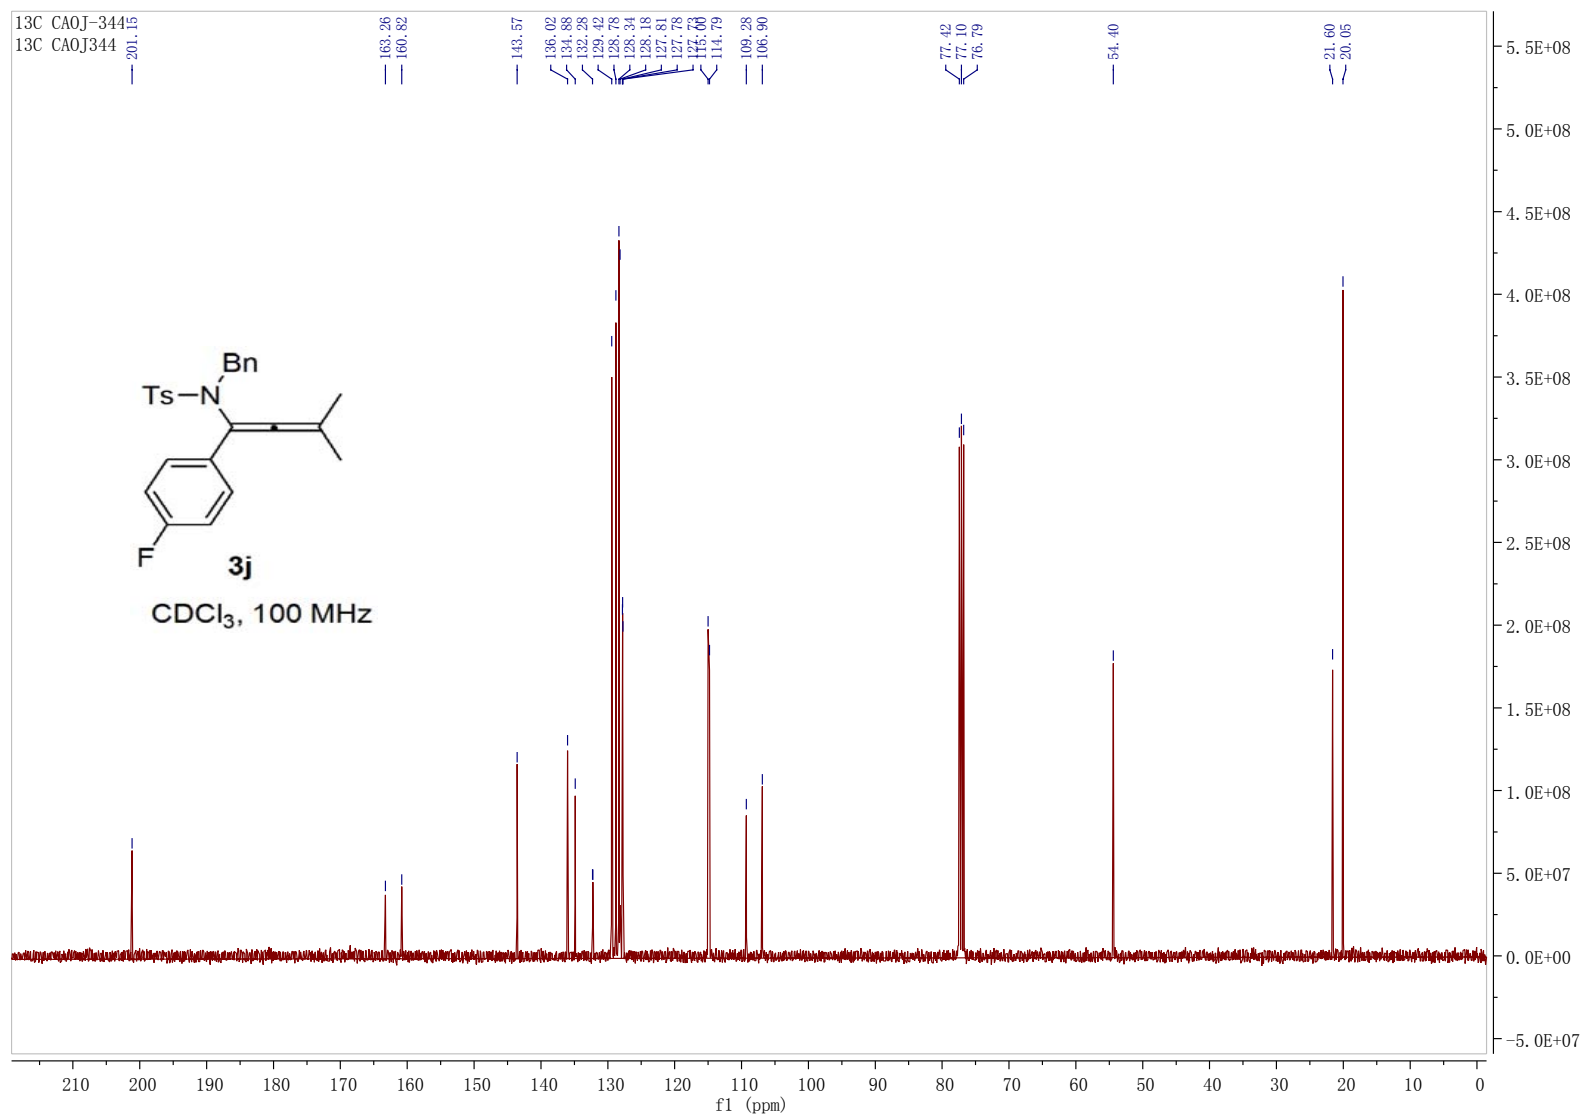

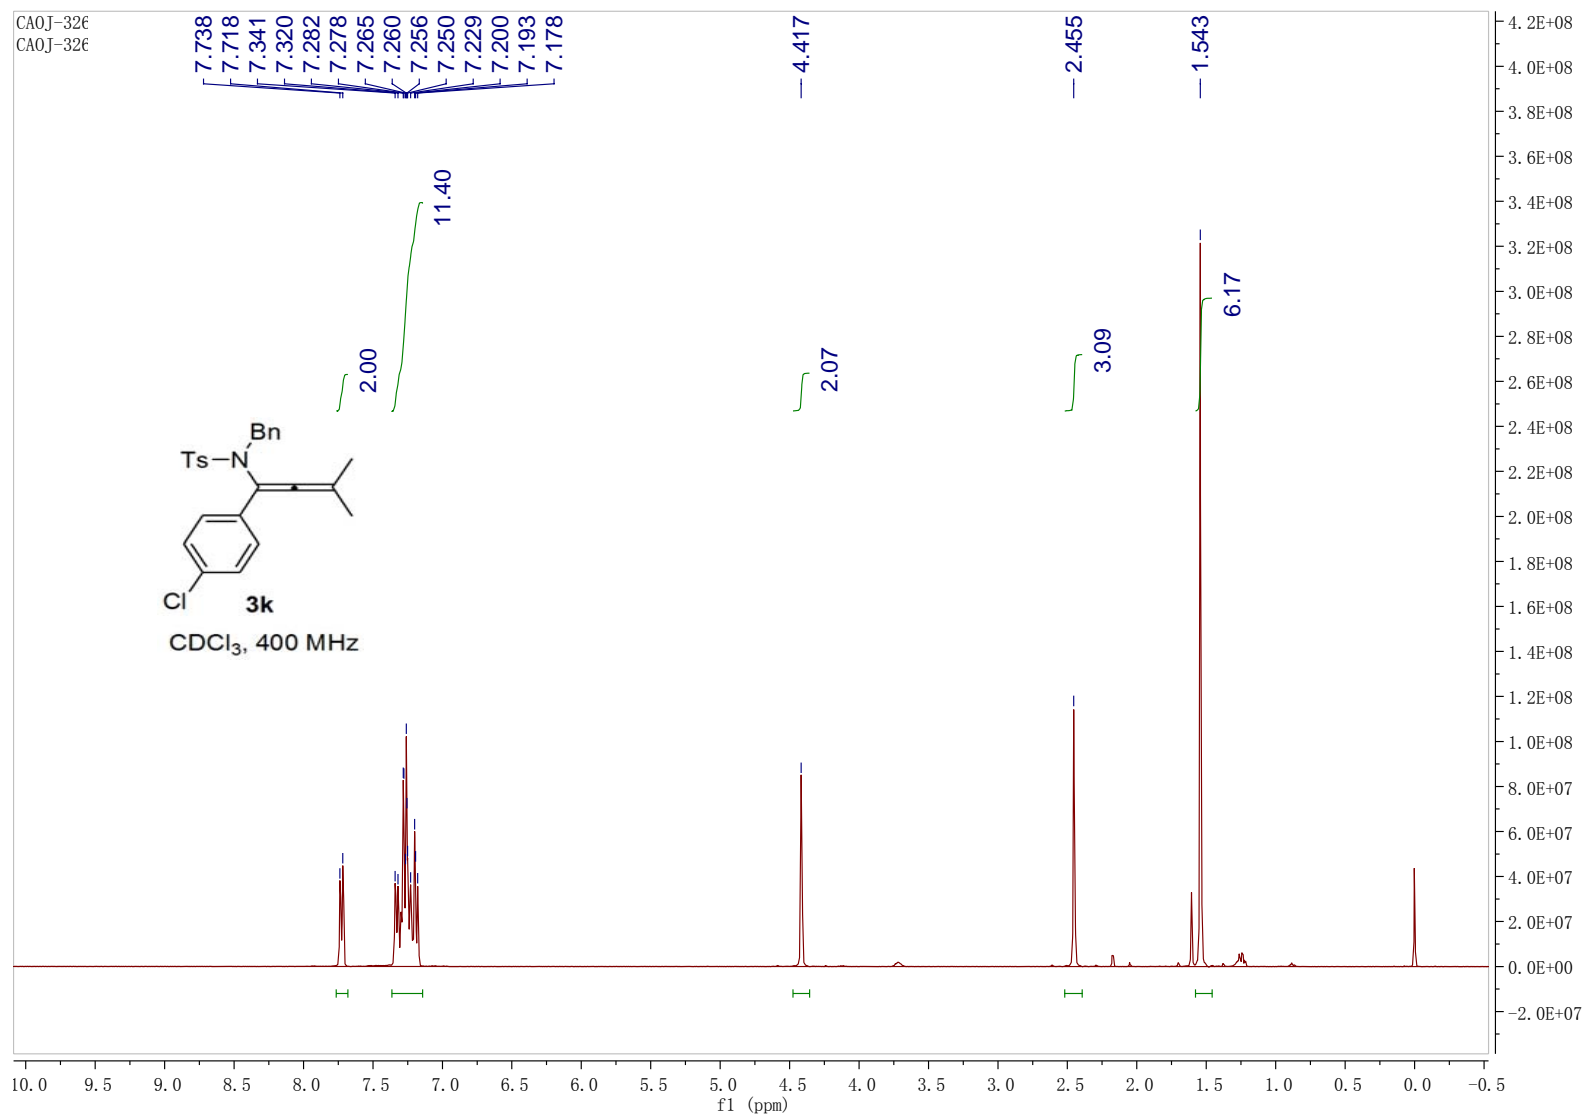

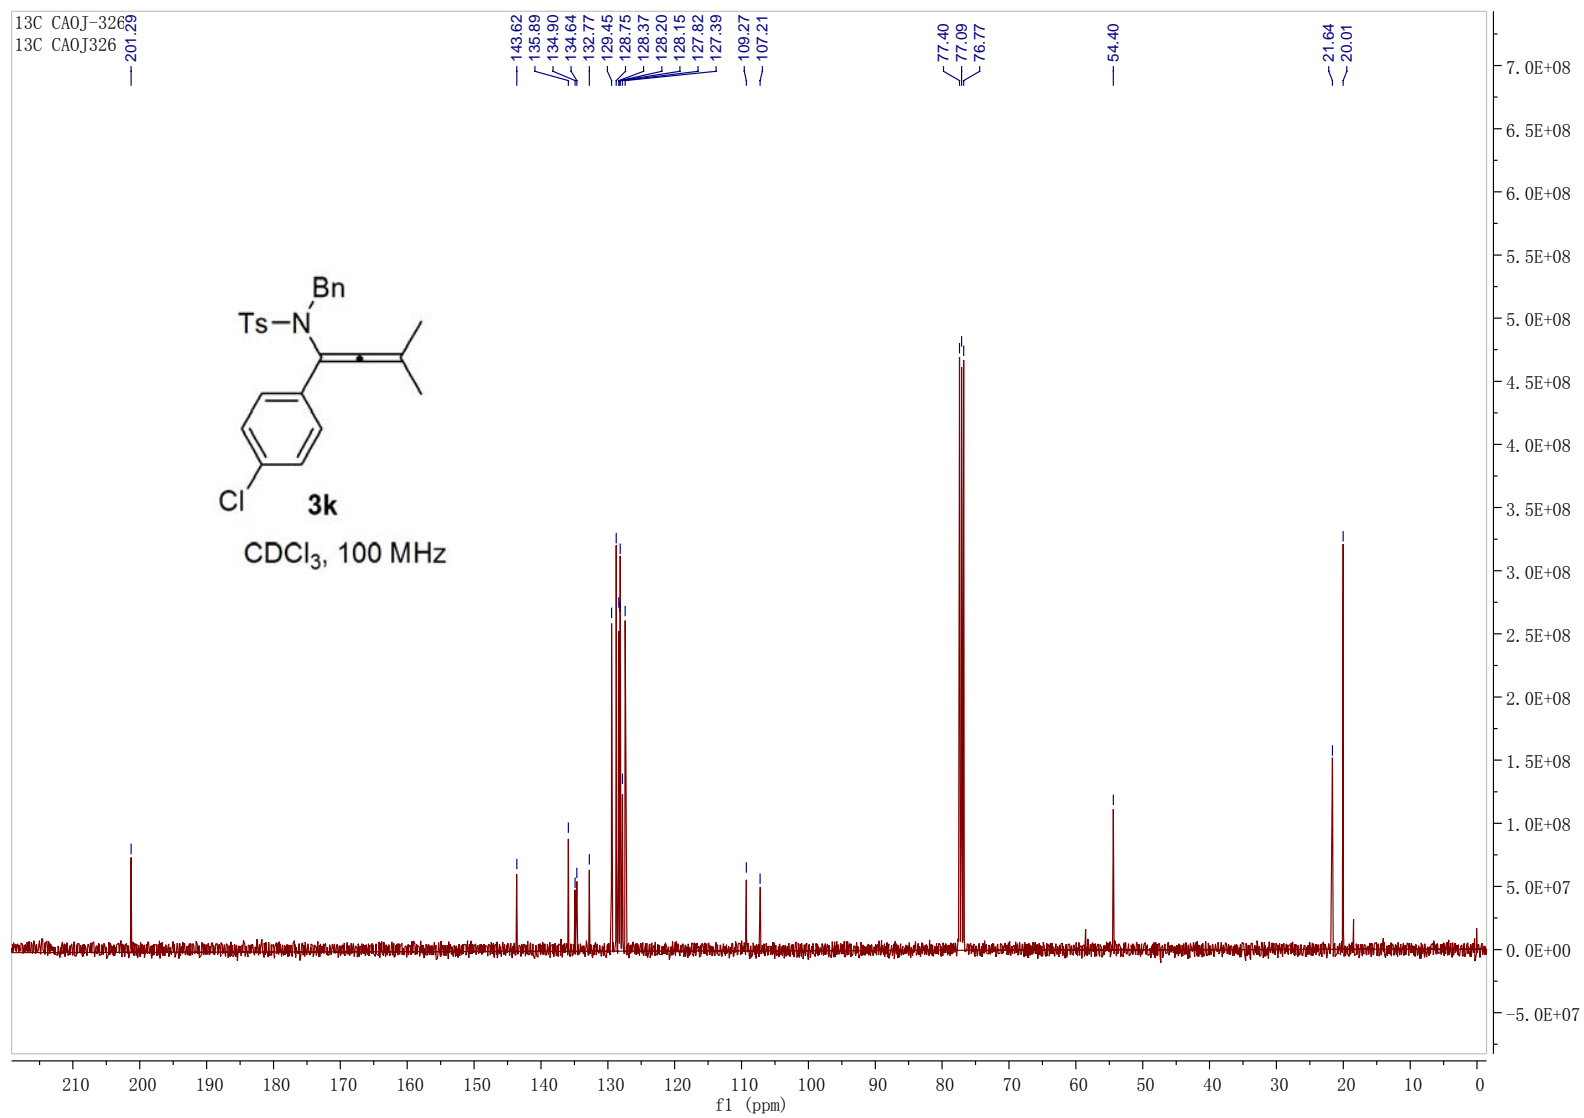

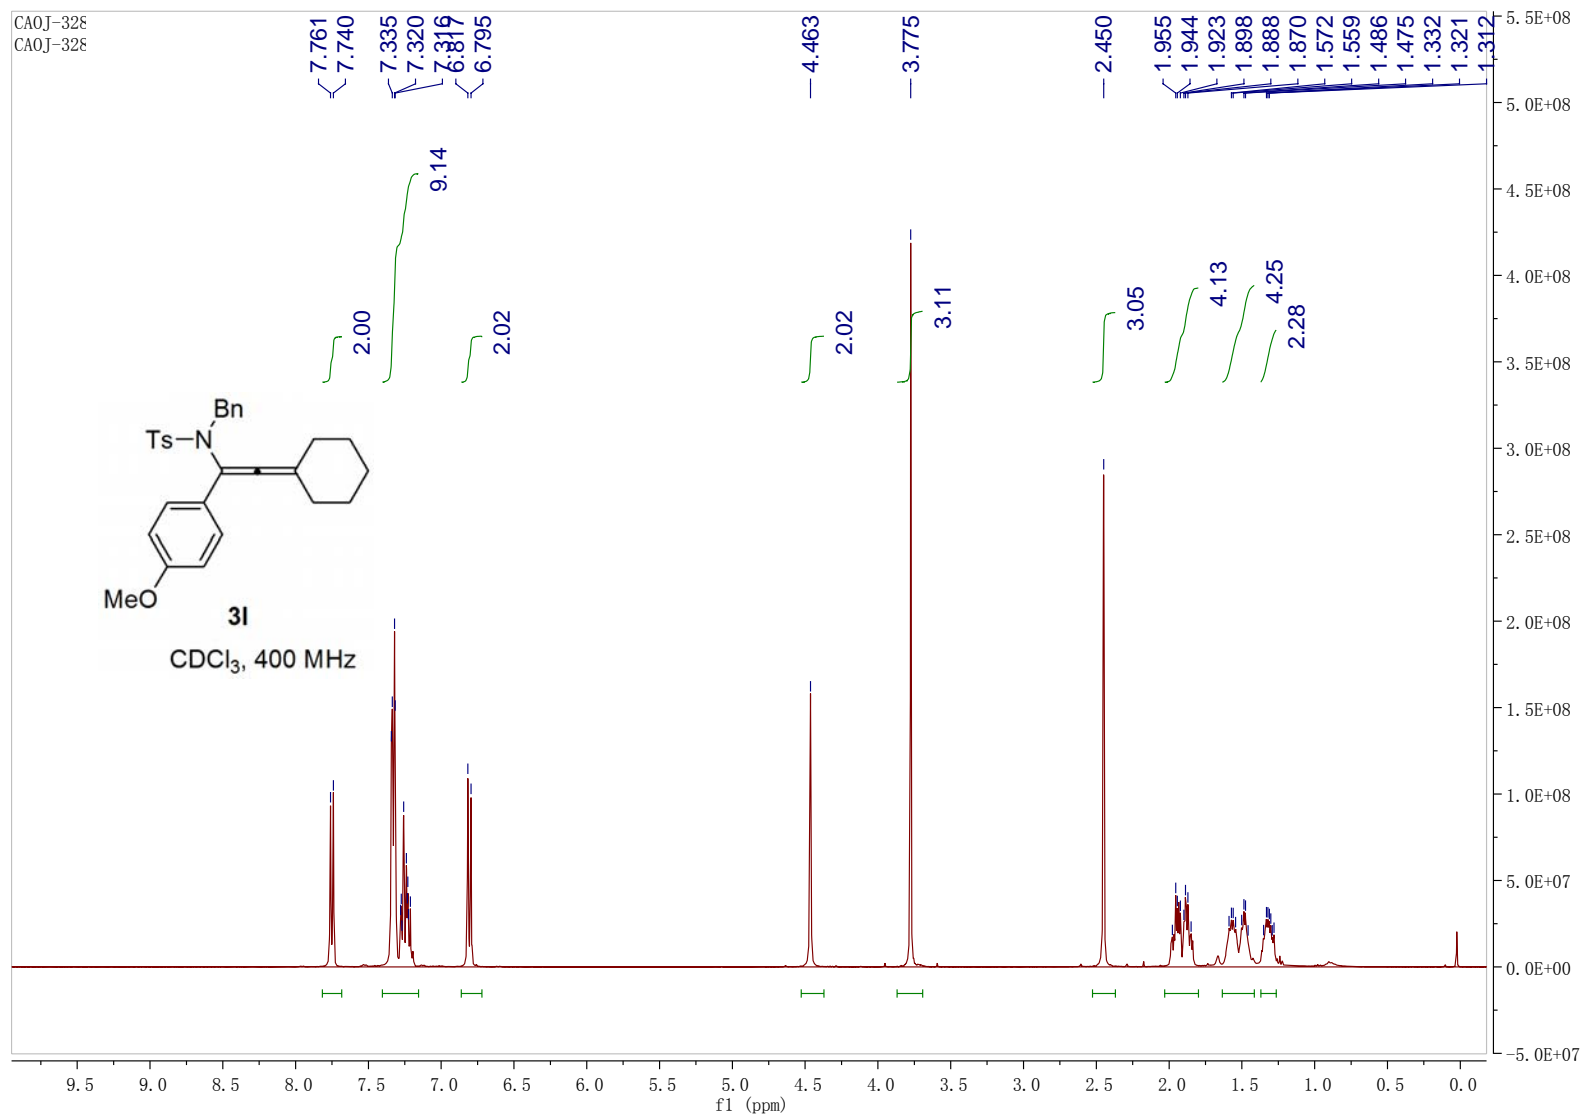

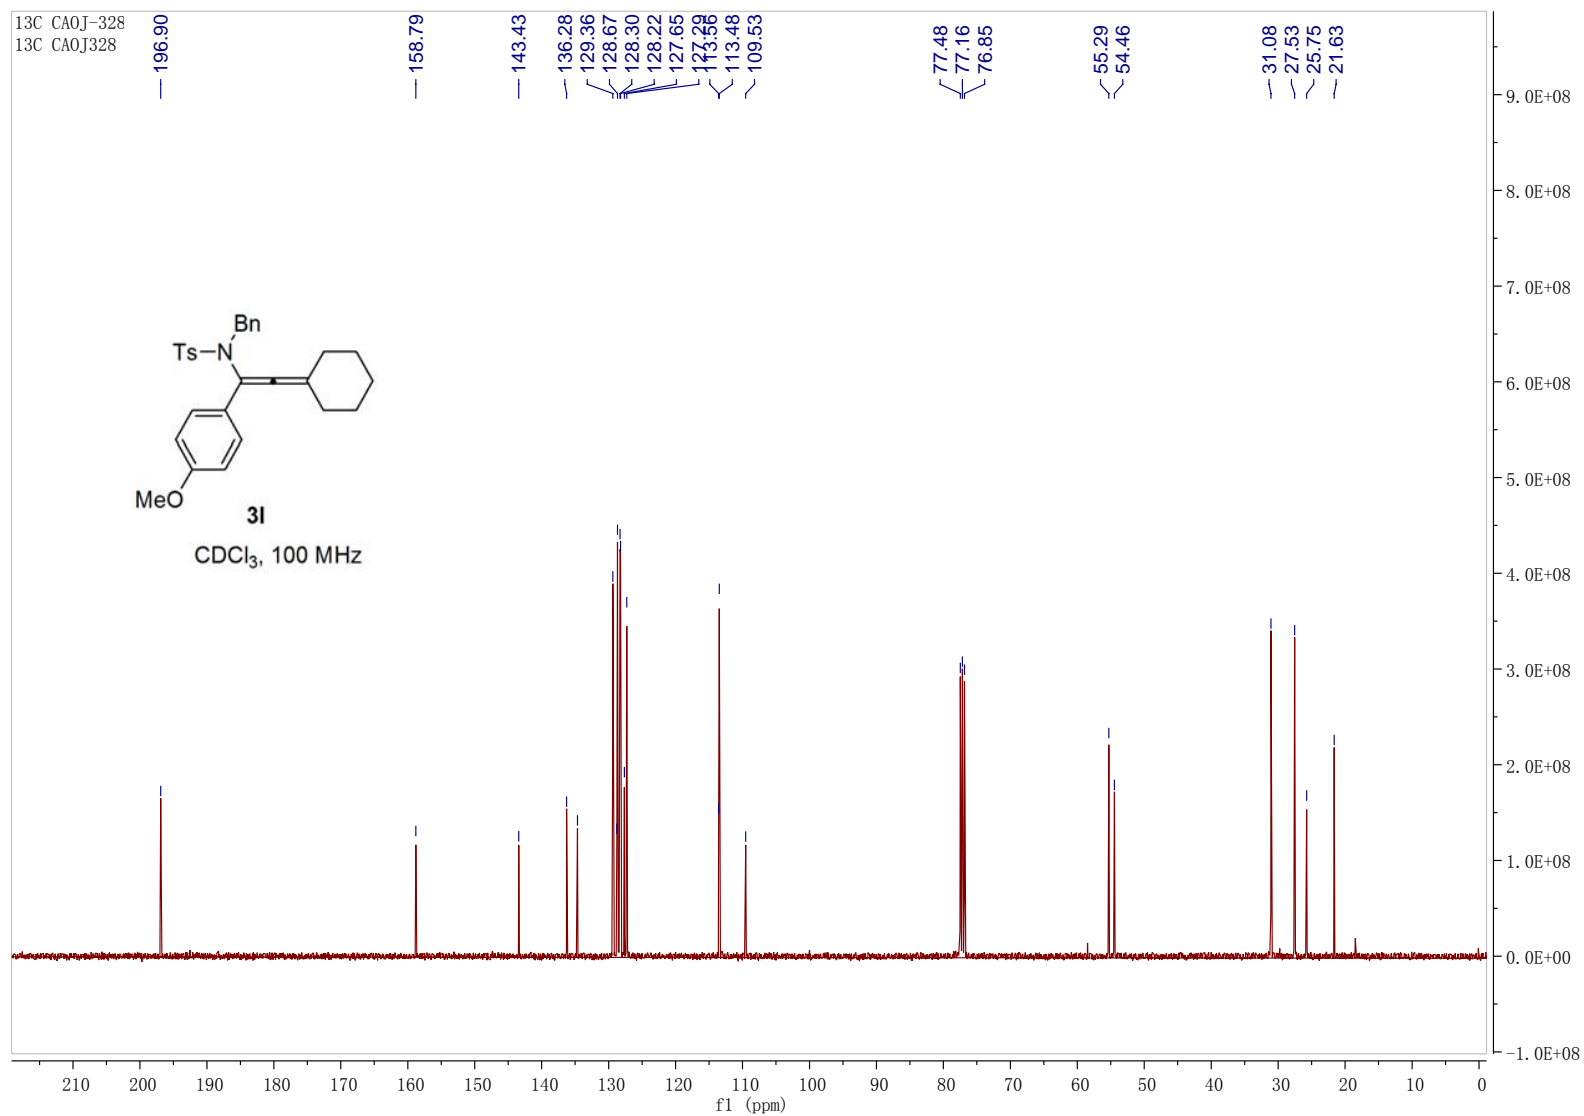

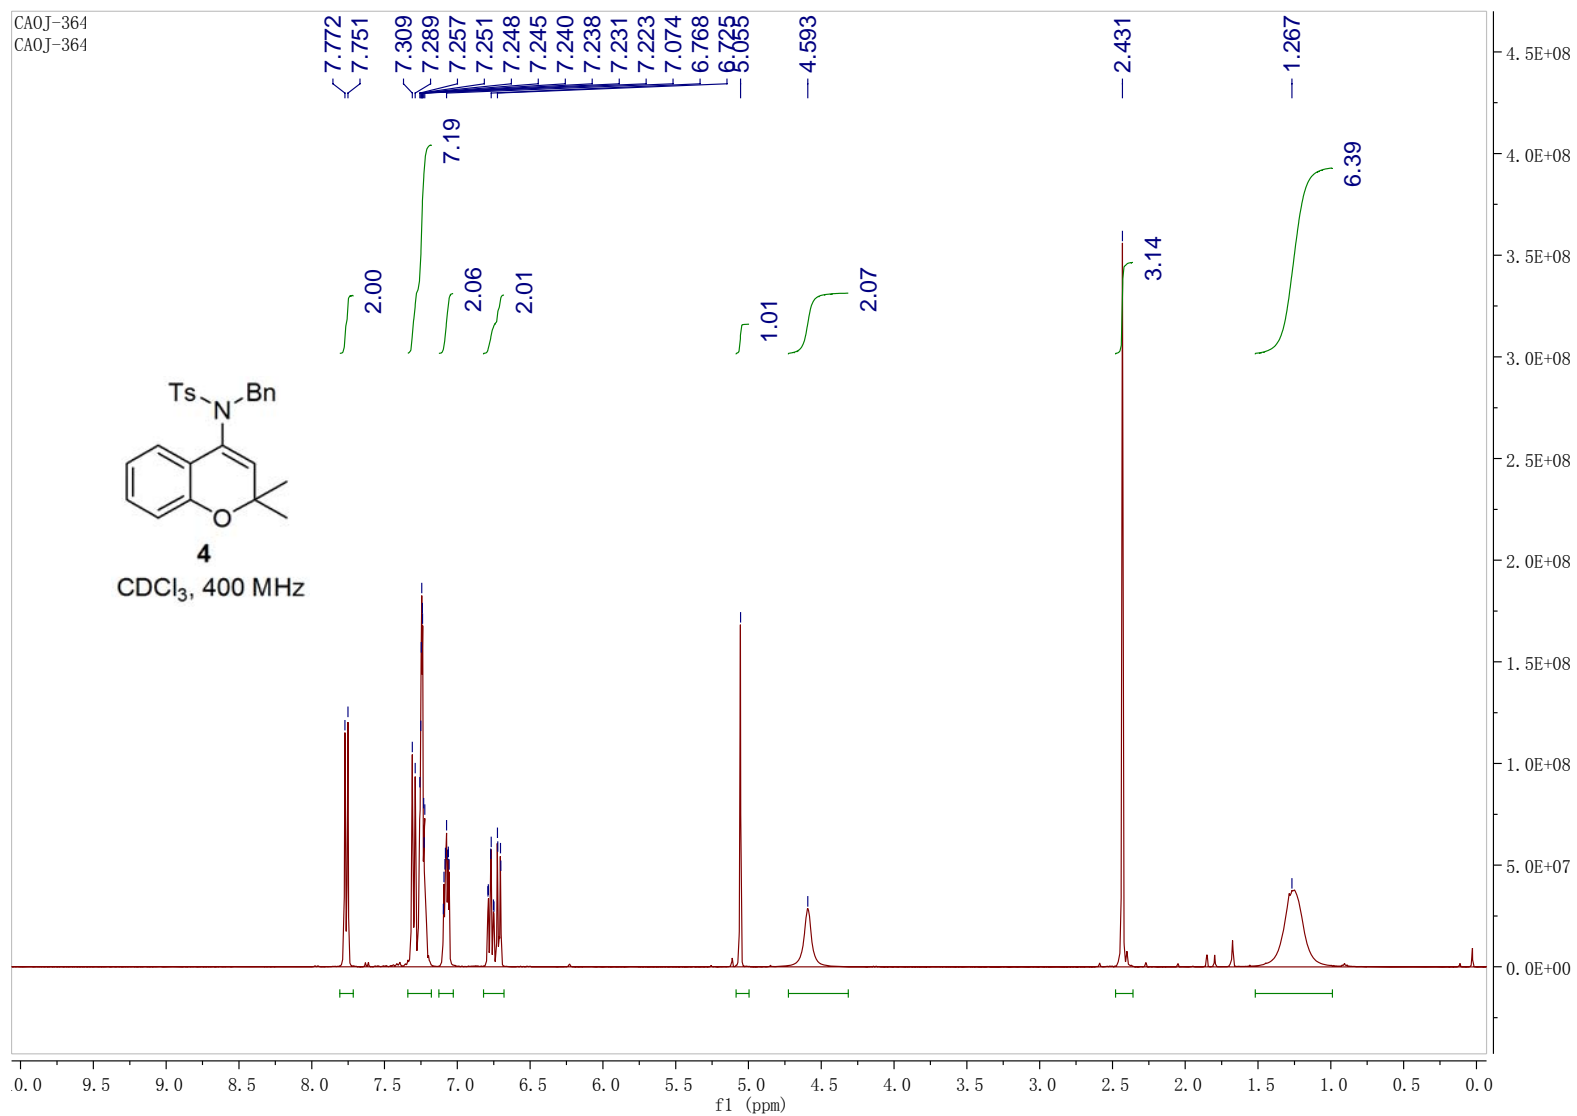

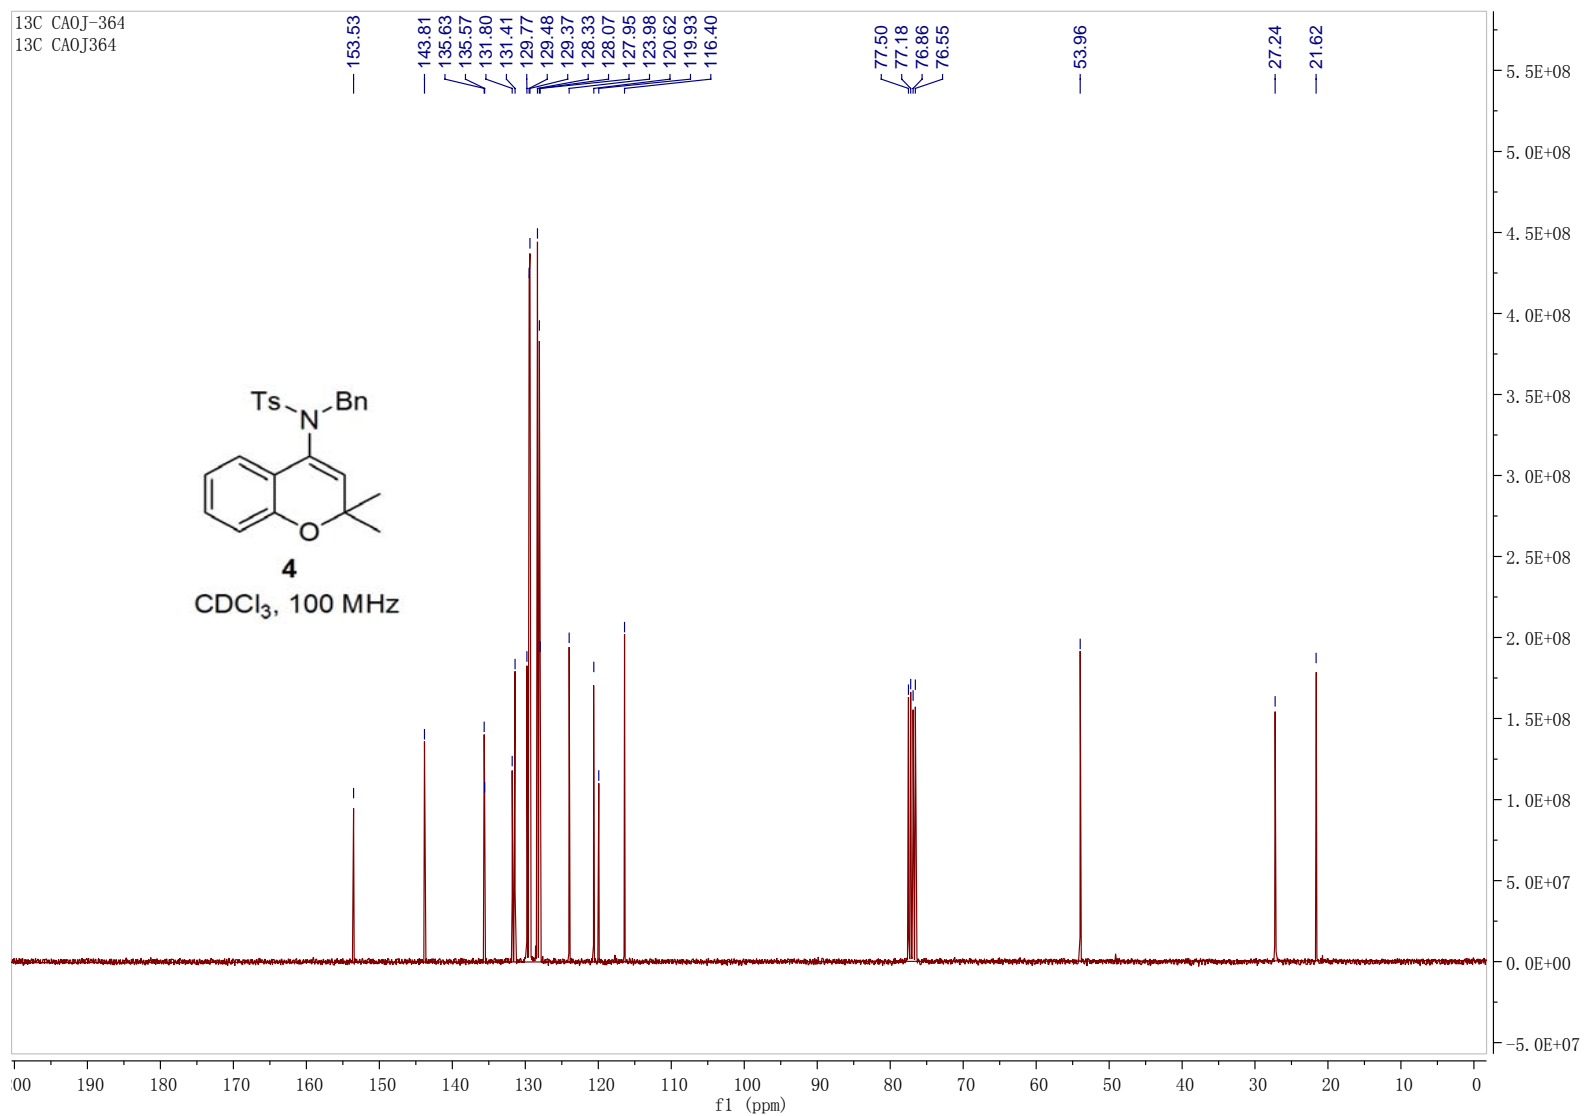

Supplement: c2ob26727f.pdf [file c2ob26727f.pdf]
